# Supplementary material for: A compendium of conserved cleavage and polyadenylation events in mammalian genes
Source: PubMed Central journal article supplement — Genome Res. 2018 Oct;28(10):1427–41. doi: 10.1101/gr.237826.118 (PMC6169888; doi:10.1101/gr.237826.118), 2018-10
Supplement: supp_gr.237826.118_Supplemental_Fig_S3.pdf [file supp_gr.237826.118_Supplemental_Fig_S3.pdf]

Figure S3

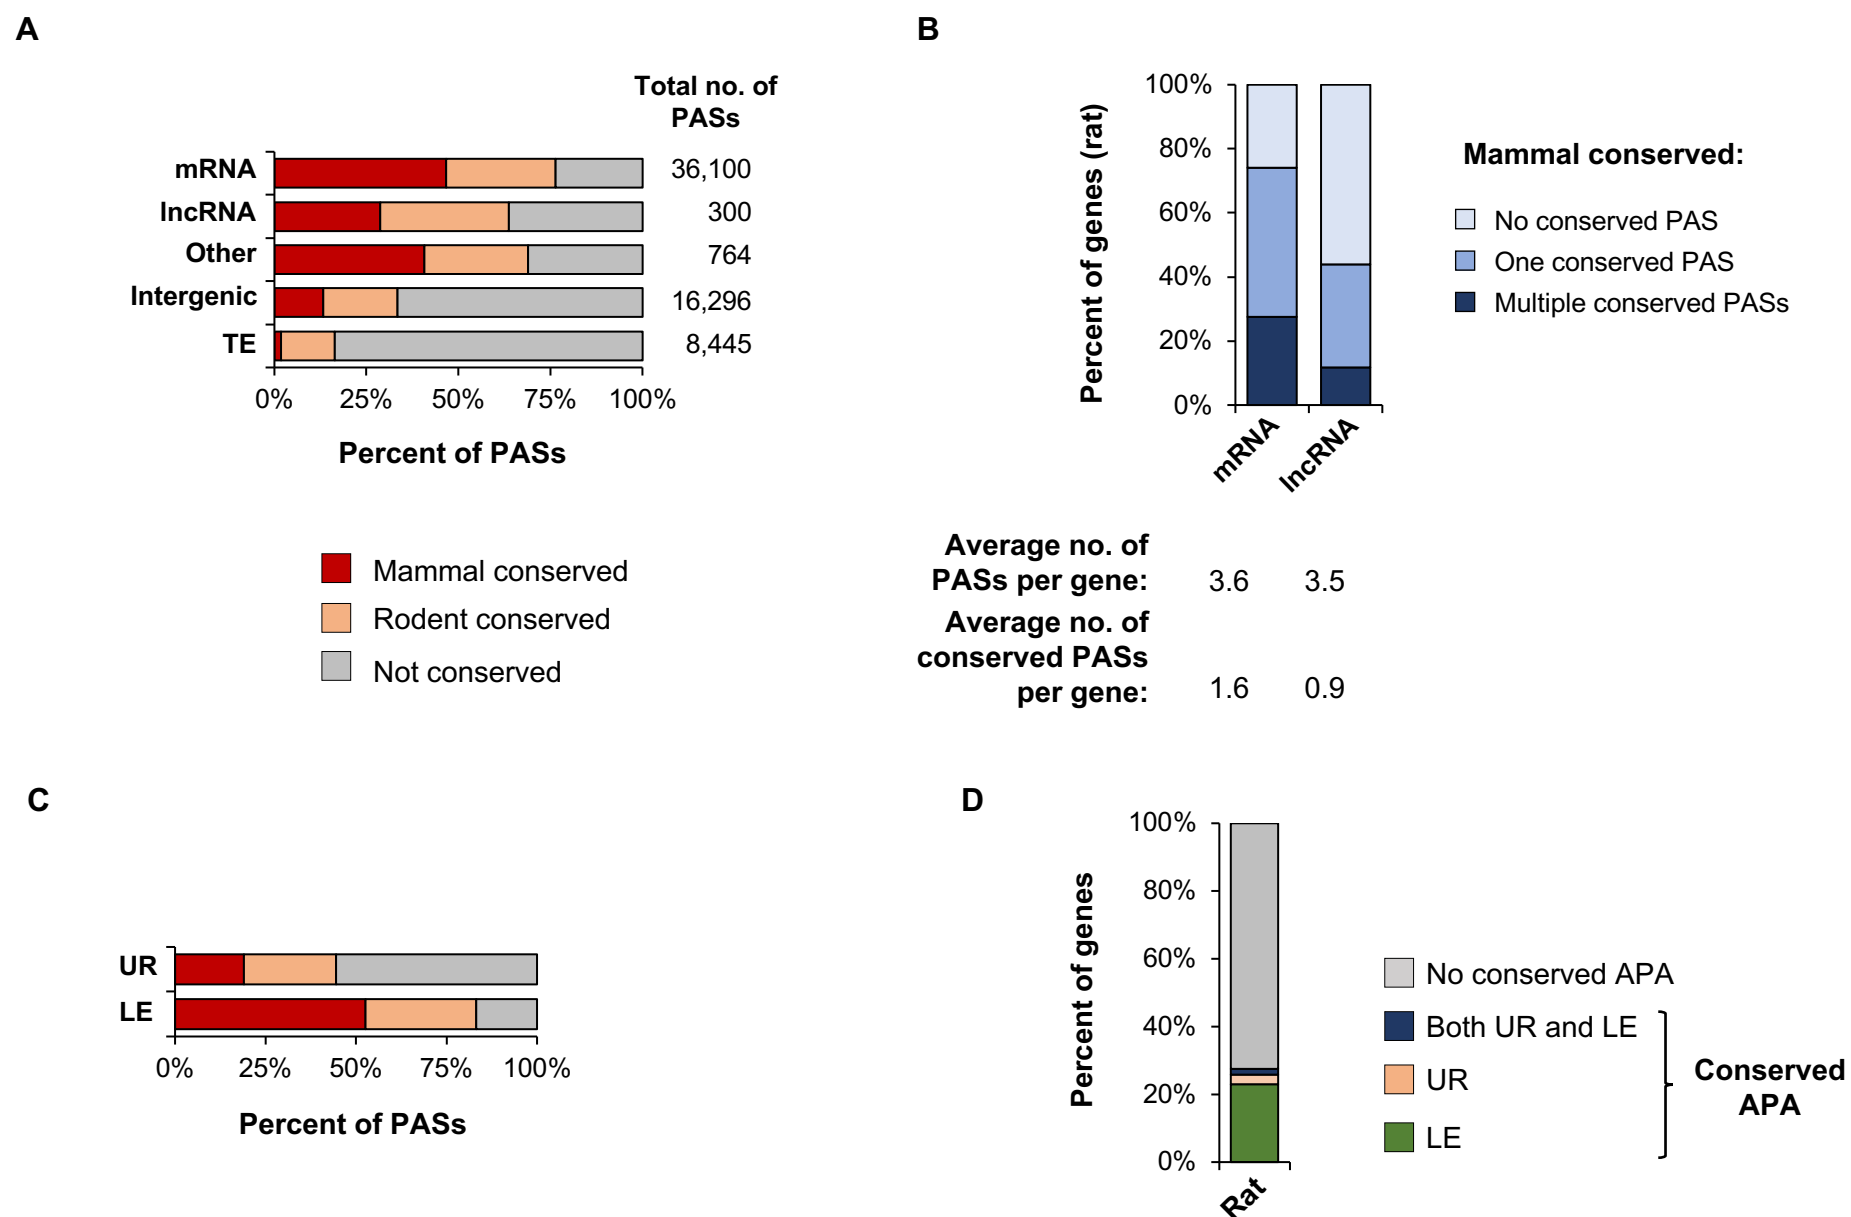

**Figure S3. Conserved PASs in rat. (A)** Percent of conserved PASs of in different gene groups. The number of PASs in each group is indicated. **(B)** Percent of mRNA or lncRNA genes with mammal conserved PASs. The average number of all or conserved PASs per gene is indicated. **(C)** Percent of mammal conserved UR or LE PASs. **(D)** Percent of genes with mammal conserved APA sites in UR, LE, or both.
