# Supplementary material for: A compendium of conserved cleavage and polyadenylation events in mammalian genes
Source: PubMed Central journal article supplement — Genome Res. 2018 Oct;28(10):1427–41. doi: 10.1101/gr.237826.118 (PMC6169888; doi:10.1101/gr.237826.118), 2018-10
Supplement: supp_gr.237826.118_Supplemental_Fig_S4.pdf [file supp_gr.237826.118_Supplemental_Fig_S4.pdf]

**Figure S4**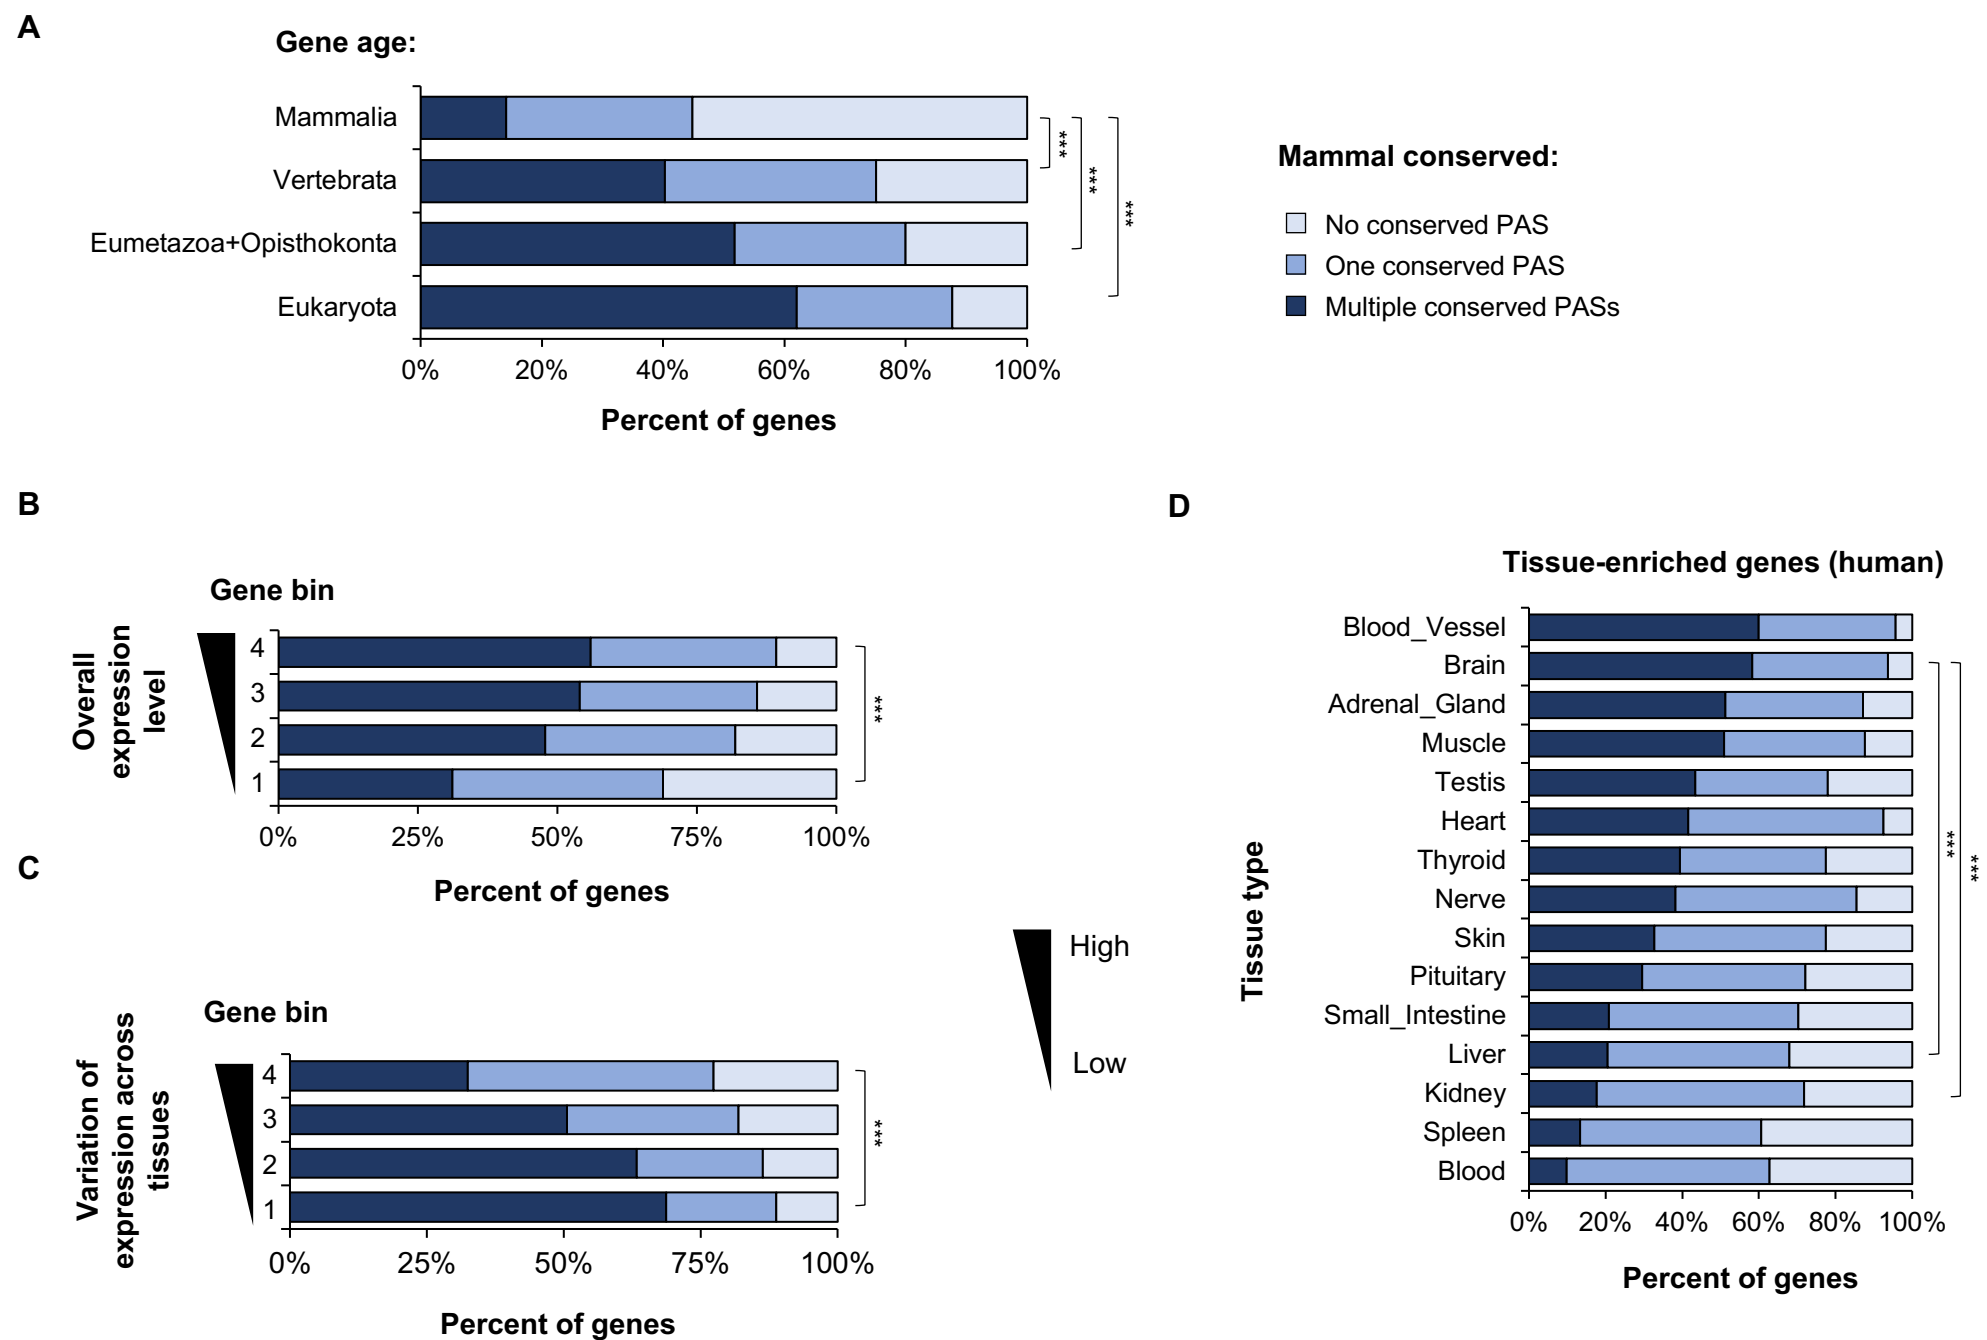

**Figure S4. Conservation of APA. (A)** Conservation of PASs in mRNA genes with different ages. **(B)** PAS conservation vs. gene expression levels using human GTEx RNA-seq data. Human genes were divided into four groups based on expression levels (average transcripts per million, TPM) across 28 human GTEx tissue samples. **(C)** PAS conservation vs. variation of gene expression levels. Human genes were divided into four groups based on the coefficient of variation of expression levels across 28 human GTEx tissues. **(D)** PAS conservation for genes with tissue-specific expression (defined by the GTEx data, only tissues with more than 50 specific genes are shown).
