# Supplementary material for: A compendium of conserved cleavage and polyadenylation events in mammalian genes
Source: PubMed Central journal article supplement — Genome Res. 2018 Oct;28(10):1427–41. doi: 10.1101/gr.237826.118 (PMC6169888; doi:10.1101/gr.237826.118), 2018-10
Supplement: supp_gr.237826.118_Supplemental_Fig_S5.pdf [file supp_gr.237826.118_Supplemental_Fig_S5.pdf]

Figure S5

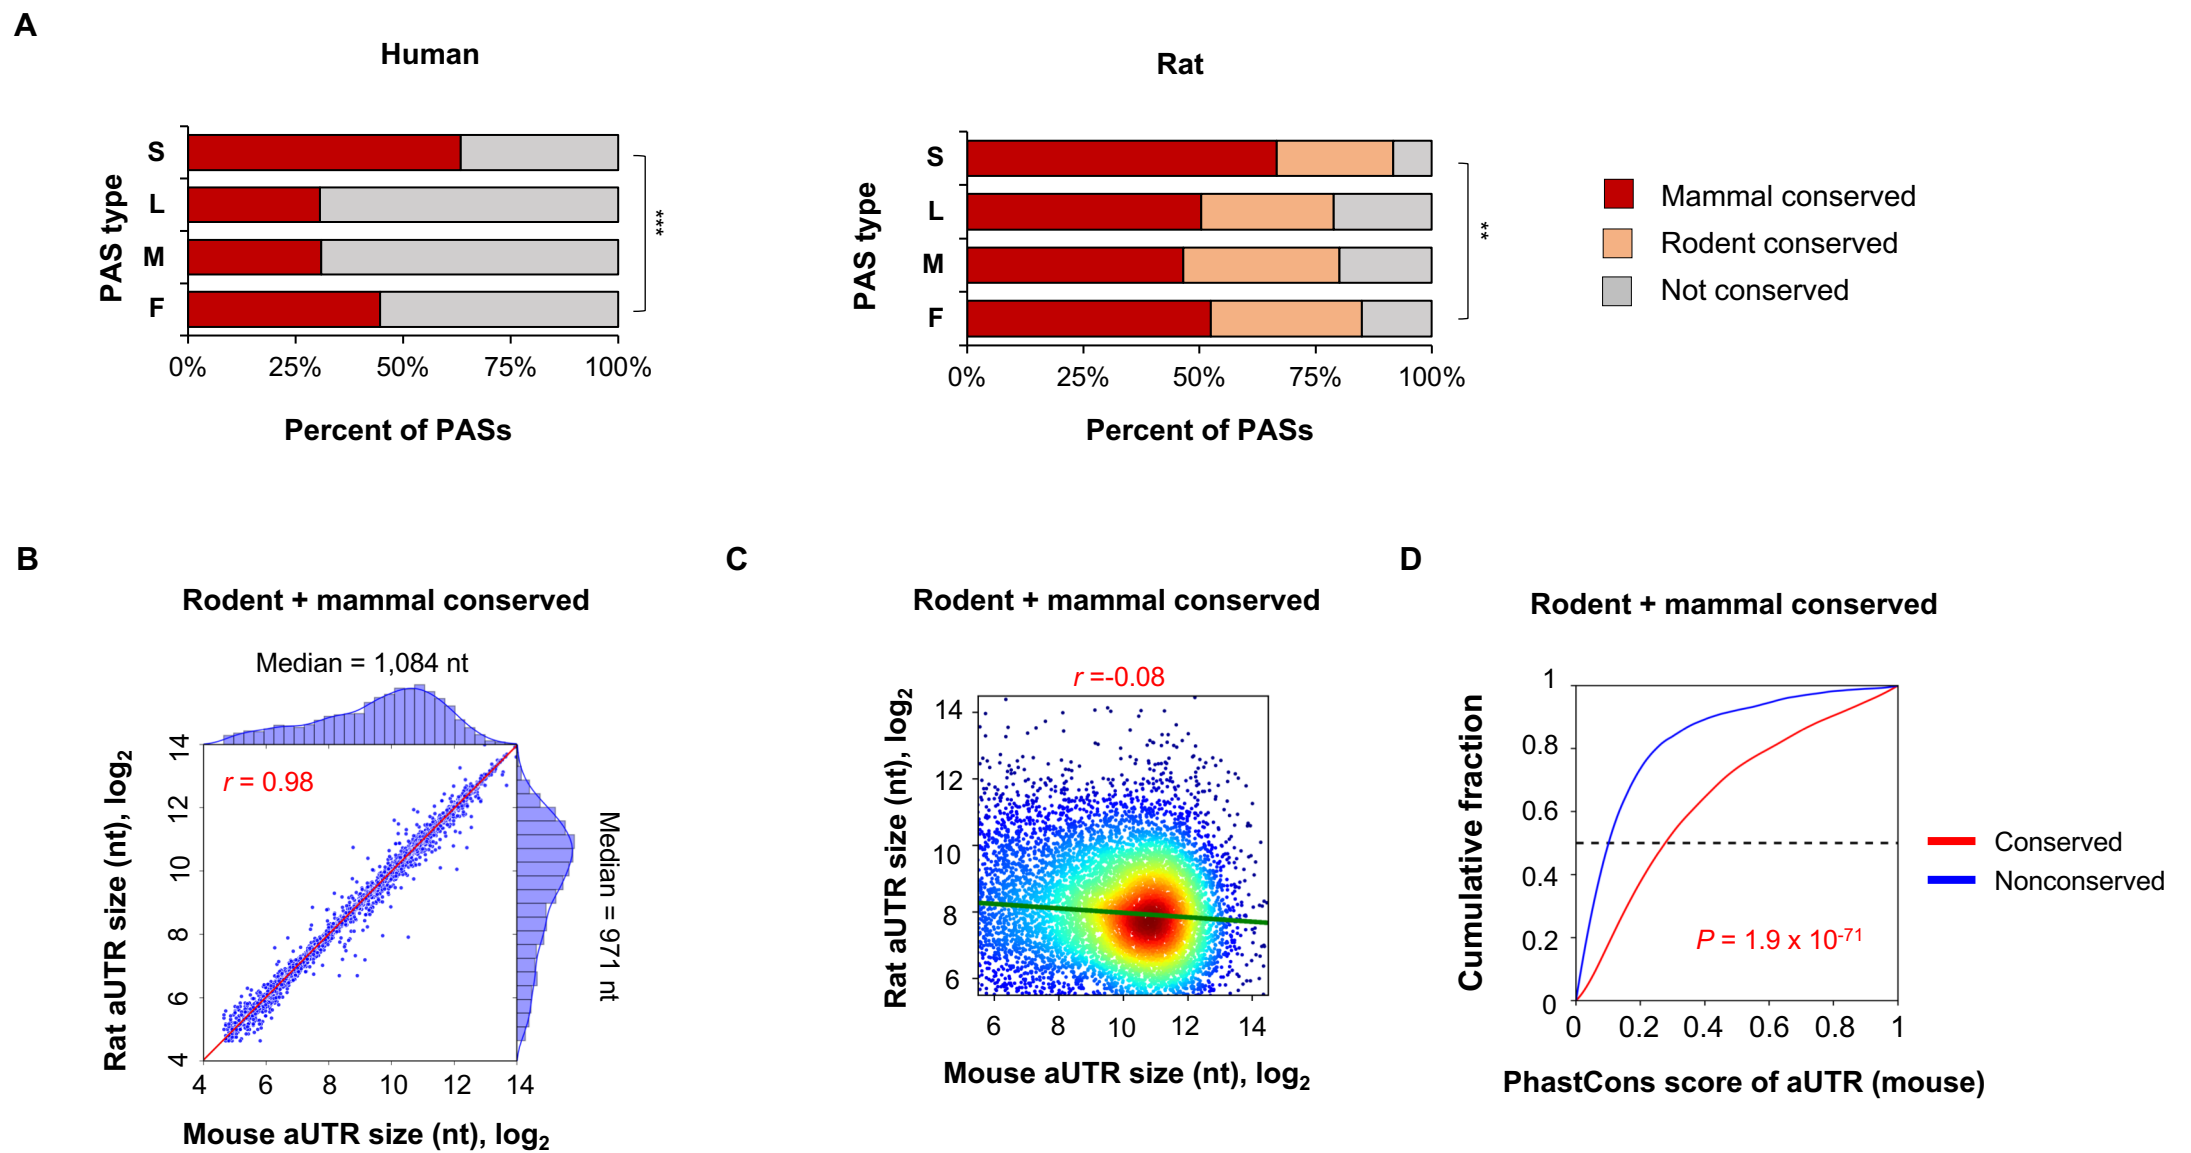

**Figure S5. aUTR analysis of human and rat genes. (A)** Conservation levels of PASs of different types. As in Figure 3B, except that the species are human and rat. **(B)** Correlation of aUTR size between mouse and rat genes (rodent + mammal conserved APA sites). As in Figure 3C, except the species are mouse and rat. **(C)** aUTR size vs. cUTR size in mouse (rodent + mammal conserved sites). **(D)** Cumulative Distribution Fraction (CDF) curves of phastCons scores of conserved aUTRs vs. nonconserved aUTRs. As in Figure 3E, except that the conserved PASs are mammal + rodent conserved.
