# Supplementary material for: A compendium of conserved cleavage and polyadenylation events in mammalian genes
Source: PubMed Central journal article supplement — Genome Res. 2018 Oct;28(10):1427–41. doi: 10.1101/gr.237826.118 (PMC6169888; doi:10.1101/gr.237826.118), 2018-10
Supplement: supp_gr.237826.118_Supplemental_Fig_S7.pdf [file supp_gr.237826.118_Supplemental_Fig_S7.pdf]

Figure S7

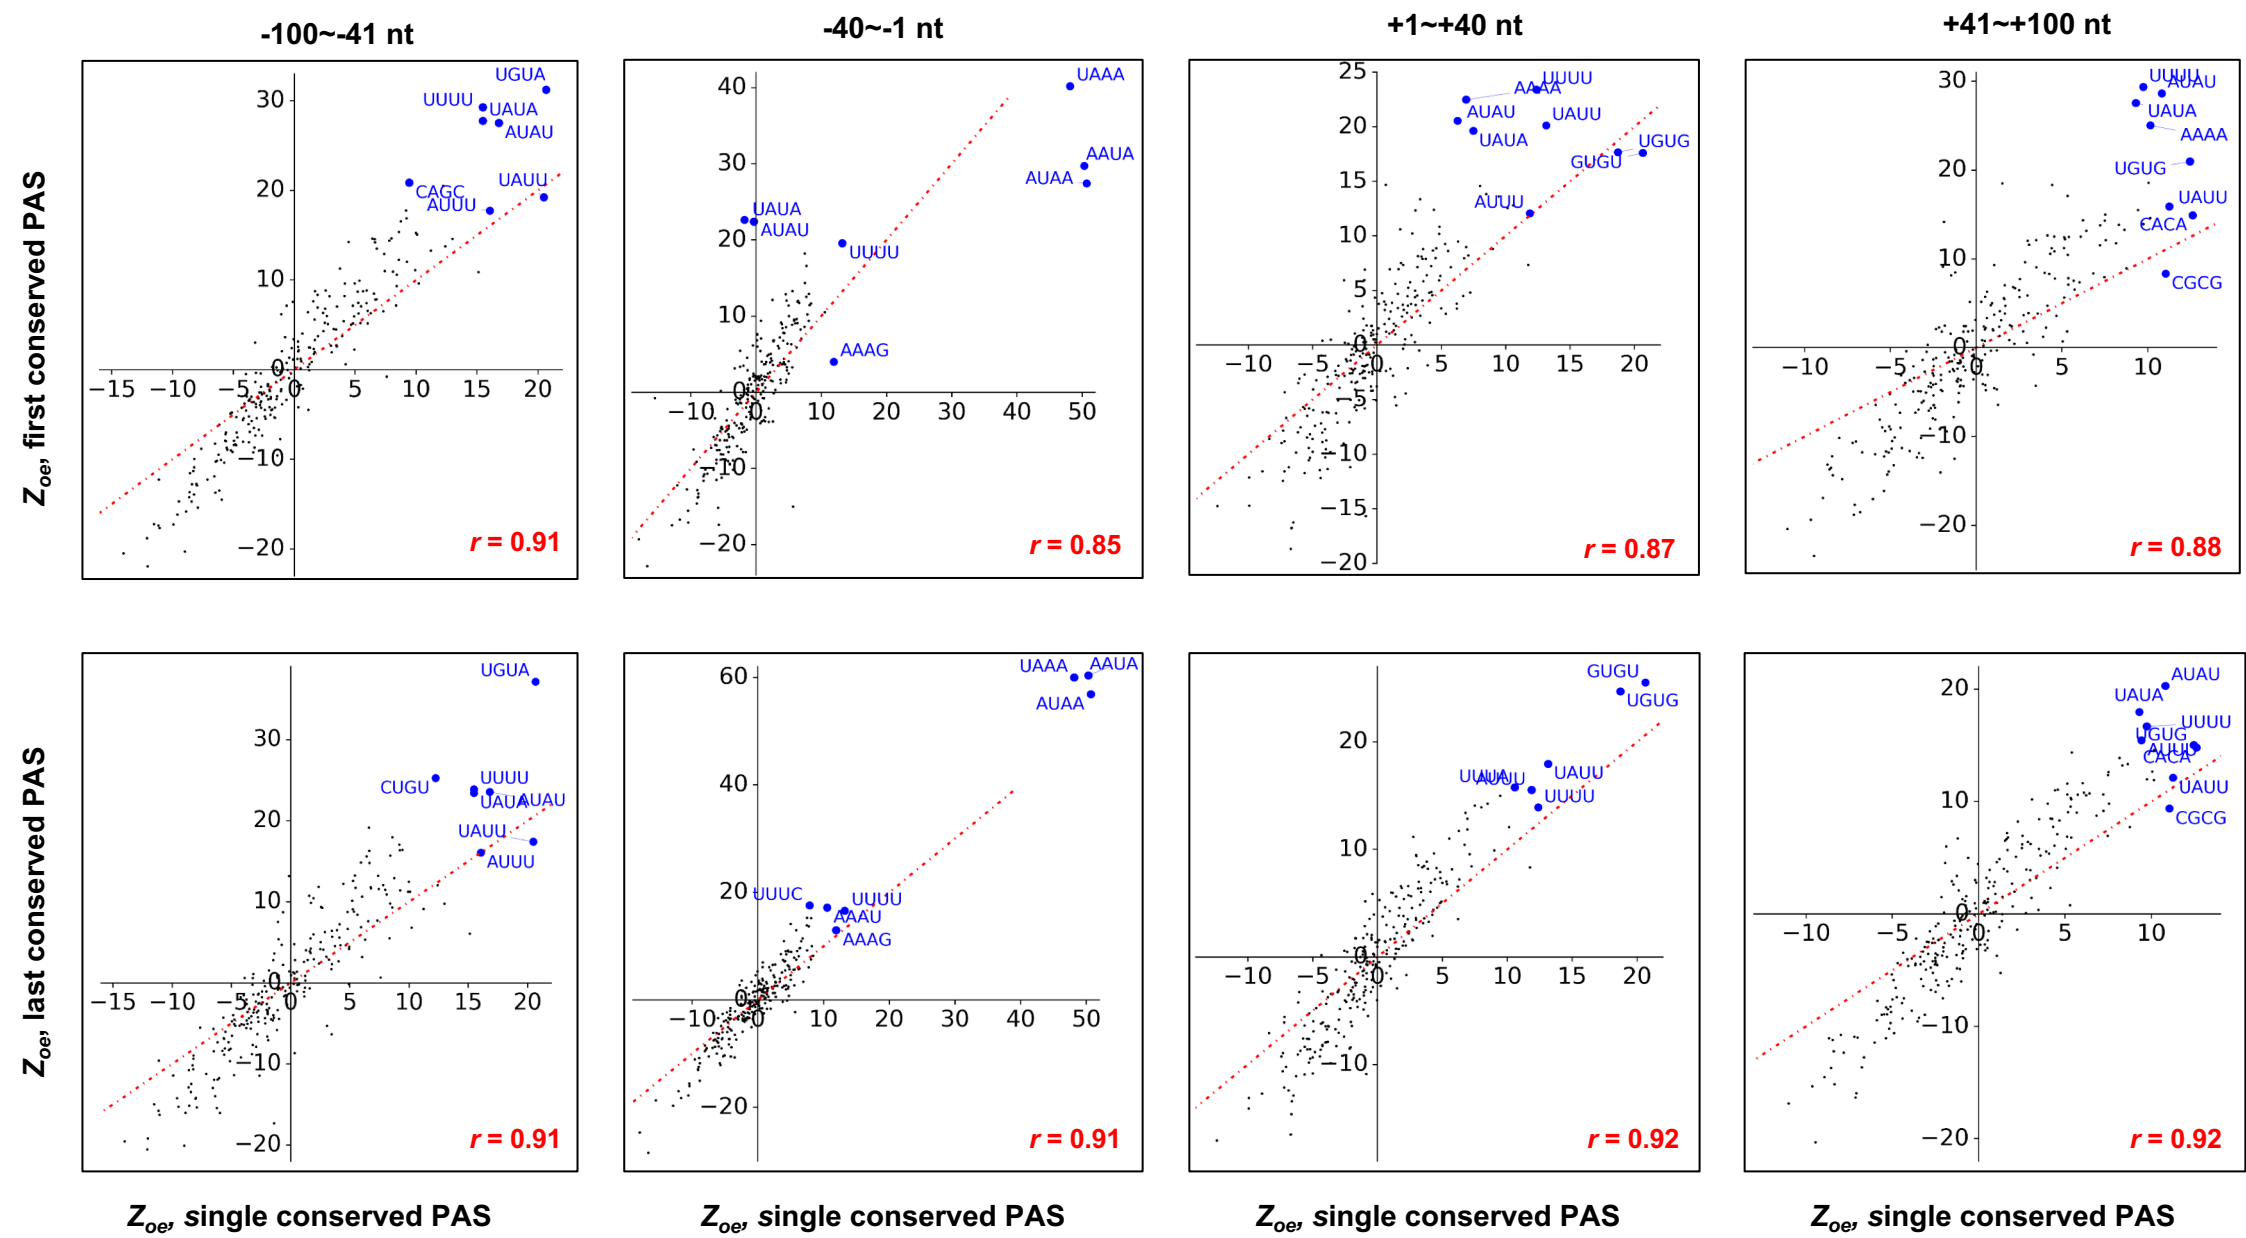

Figure S7. Comparison of sequence motifs between first or last conserved PASs and single PASs. See Figure 4B legend for  $Z_{oe}$  definition and plot format.
