# Supplementary material for: A compendium of conserved cleavage and polyadenylation events in mammalian genes
Source: PubMed Central journal article supplement — Genome Res. 2018 Oct;28(10):1427–41. doi: 10.1101/gr.237826.118 (PMC6169888; doi:10.1101/gr.237826.118), 2018-10
Supplement: supp_gr.237826.118_Supplemental_Fig_S8.pdf [file supp_gr.237826.118_Supplemental_Fig_S8.pdf]

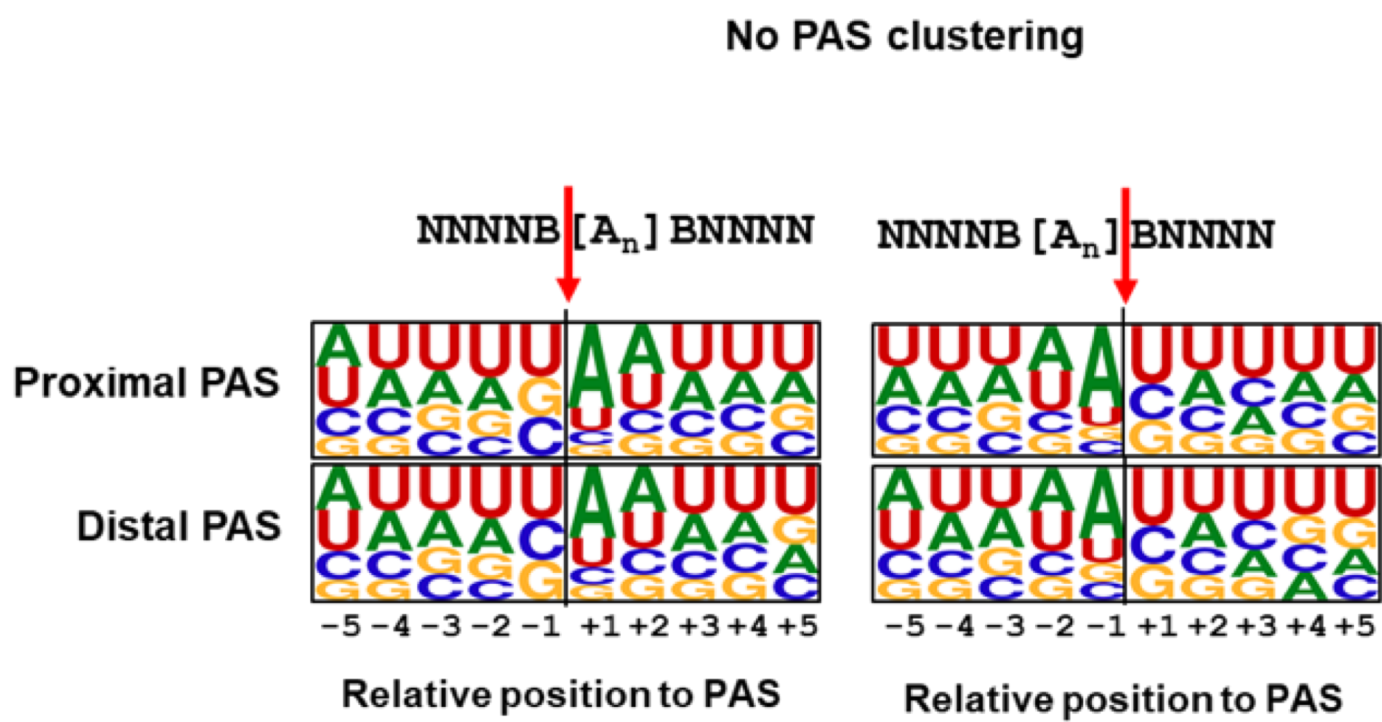

**Figure S8. Sequence motifs at the cleavage site.** Same as Figure 4E except that no PAS clustering was conducted. See Figure 4E for details.
