# Supplementary material for: A compendium of conserved cleavage and polyadenylation events in mammalian genes
Source: PubMed Central journal article supplement — Genome Res. 2018 Oct;28(10):1427–41. doi: 10.1101/gr.237826.118 (PMC6169888; doi:10.1101/gr.237826.118), 2018-10
Supplement: supp_gr.237826.118_Supplemental_Fig_S9.pdf [file supp_gr.237826.118_Supplemental_Fig_S9.pdf]

**Figure S9**

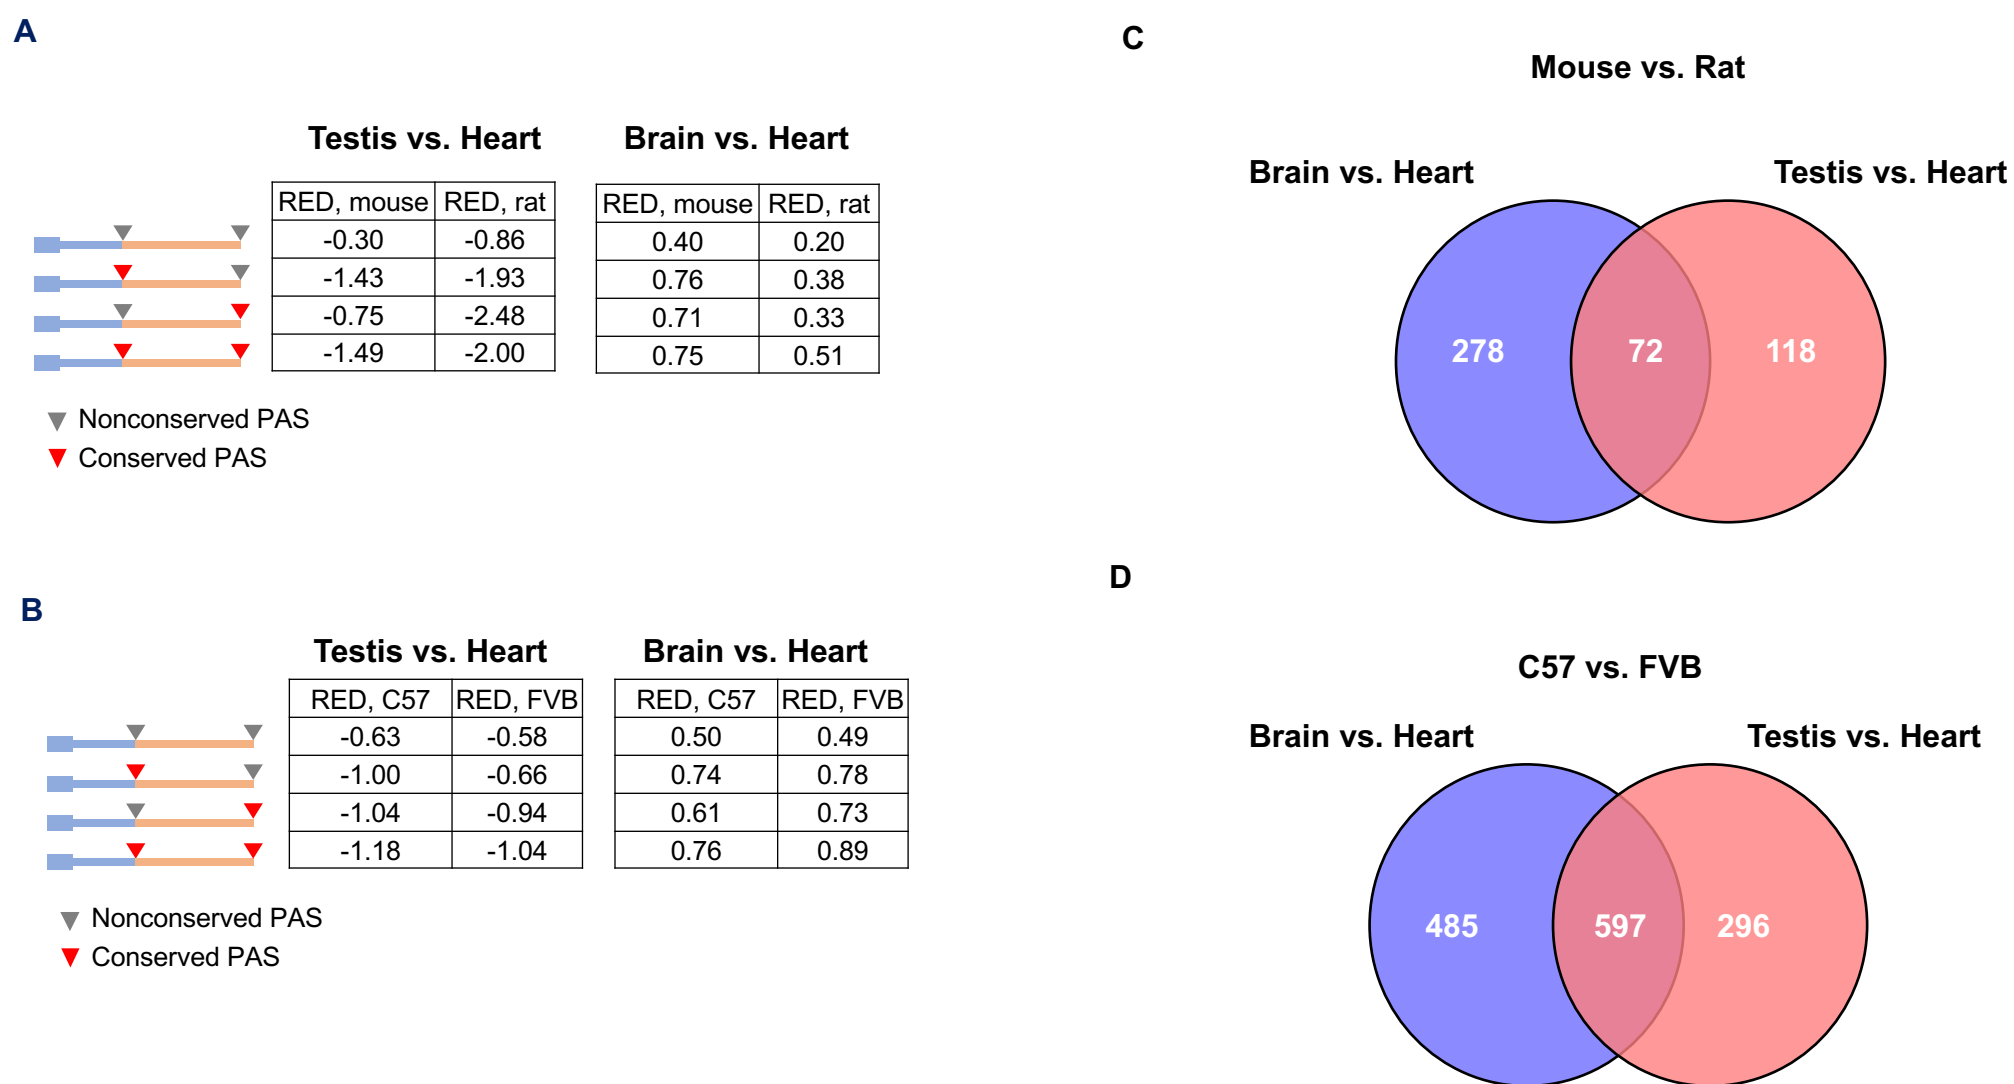

**Figure S9. Global APA trends between tissues. (A)** RED (testis vs. heart or brain vs. heart) of four types of genes in mouse and rat. The definition of gene type is the same as in Figure 5E. **(B)** RED (testis vs. heart or brain vs. heart) of four types of genes in two mouse strains (C57 vs. FVB). The definition of gene type is the same as in Figure 5G. **(C)** Venn diagram of genes with poorly correlated APA events between mouse and rat as defined in Figure 6A. **(D)** Venn diagram of genes with poorly correlated APA events between mouse strains as defined in Figure 6D.
