# Supplementary material for: A compendium of conserved cleavage and polyadenylation events in mammalian genes
Source: PubMed Central journal article supplement — Genome Res. 2018 Oct;28(10):1427–41. doi: 10.1101/gr.237826.118 (PMC6169888; doi:10.1101/gr.237826.118), 2018-10
Supplement: supp_gr.237826.118_Supplemental_Fig_S10.pdf [file supp_gr.237826.118_Supplemental_Fig_S10.pdf]

Figure S10

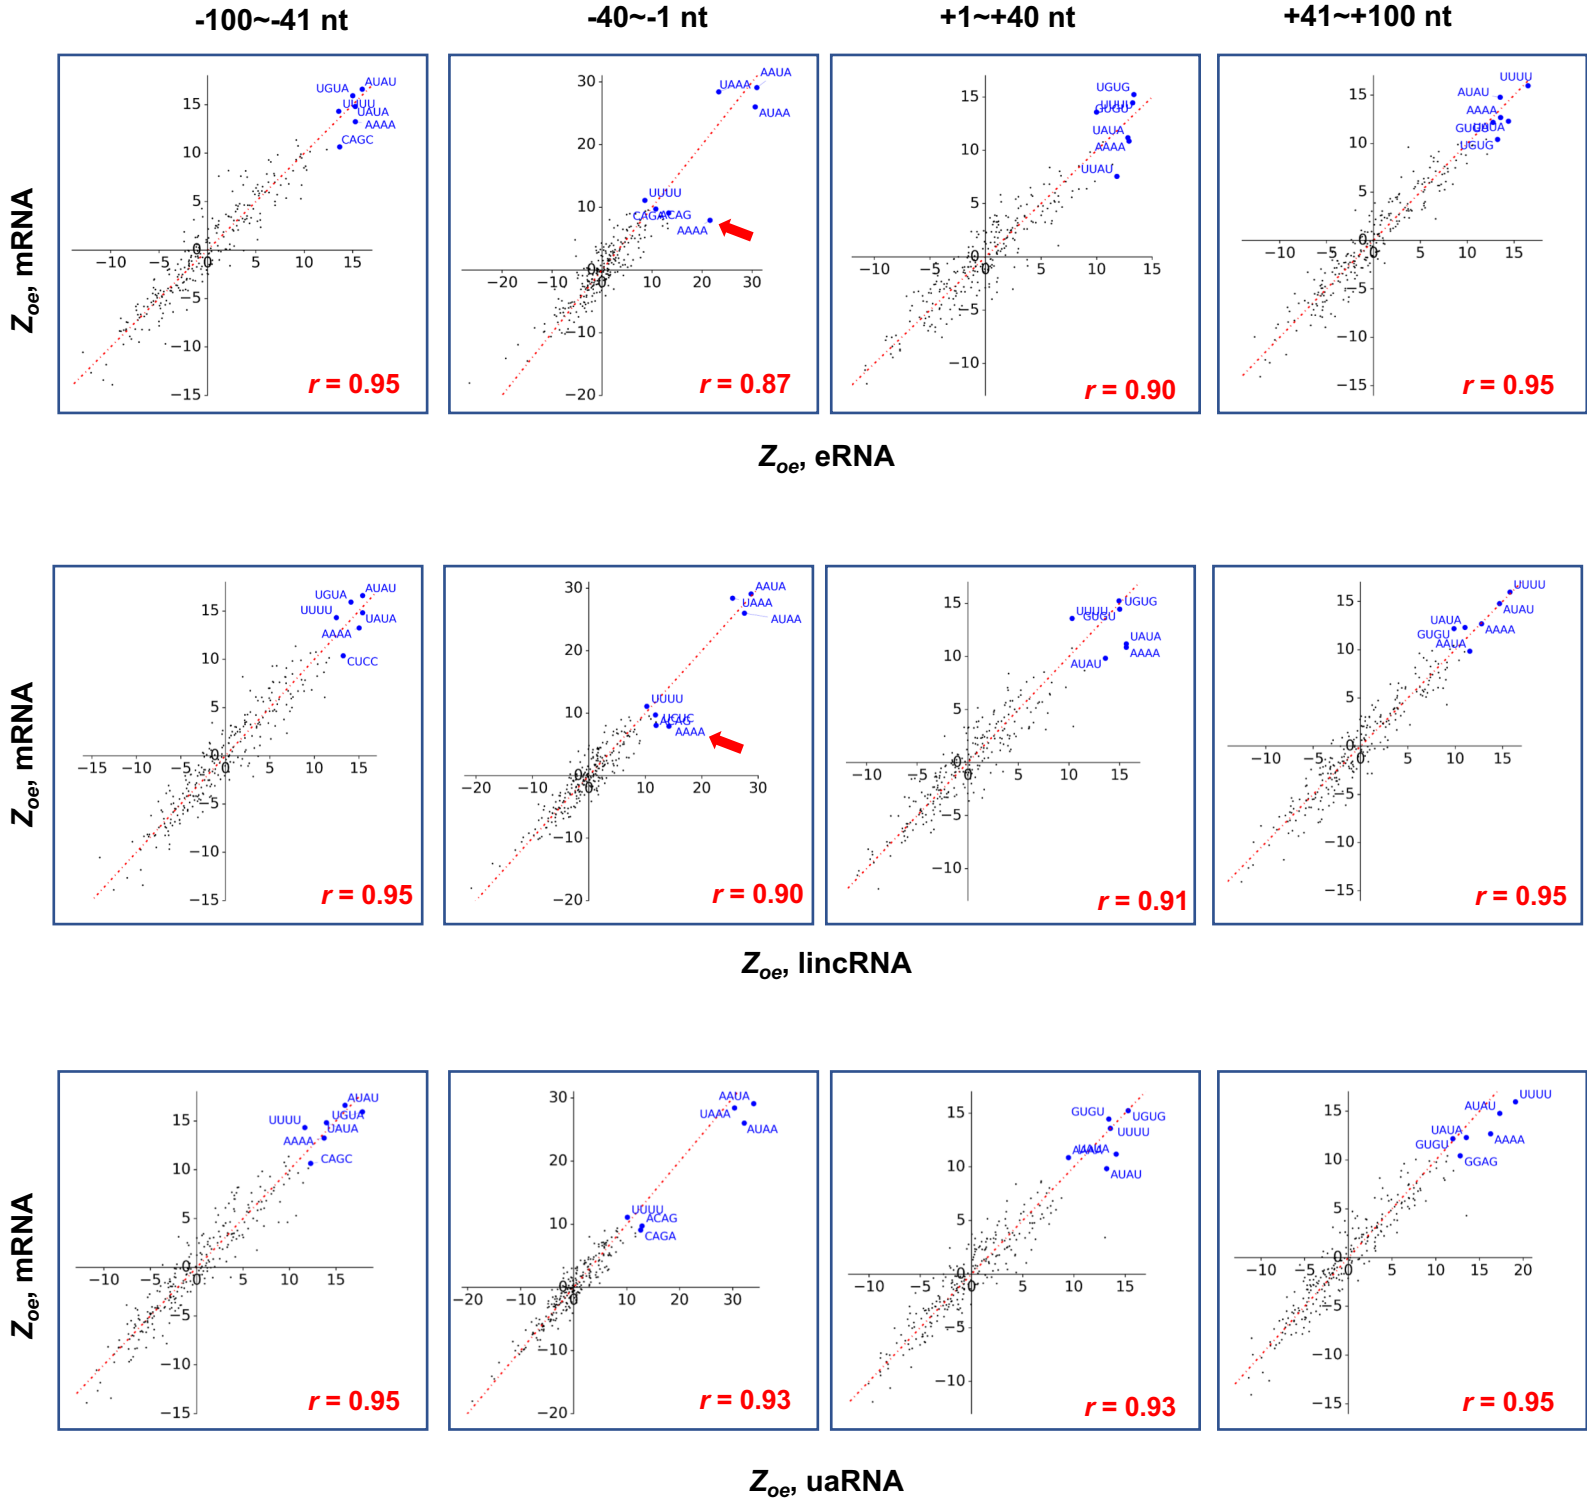

Figure S10. Comparison of sequence motifs between lincRNAs and mRNAs in four regions around the PAS. Sequence motifs are represented by tetramers. Enrichment is represented by  $Z_{oe}$  based on comparison between observed and expected PAS sequences. The 'AAAA' sequence is highlighted by an arrow to indicate difference between mRNA and lincRNA PASs.
