# Supplementary material for: A compendium of conserved cleavage and polyadenylation events in mammalian genes
Source: PubMed Central journal article supplement — Genome Res. 2018 Oct;28(10):1427–41. doi: 10.1101/gr.237826.118 (PMC6169888; doi:10.1101/gr.237826.118), 2018-10
Supplement: supp_gr.237826.118_Supplemental_Fig_S11.pdf [file supp_gr.237826.118_Supplemental_Fig_S11.pdf]

Figure S11

A

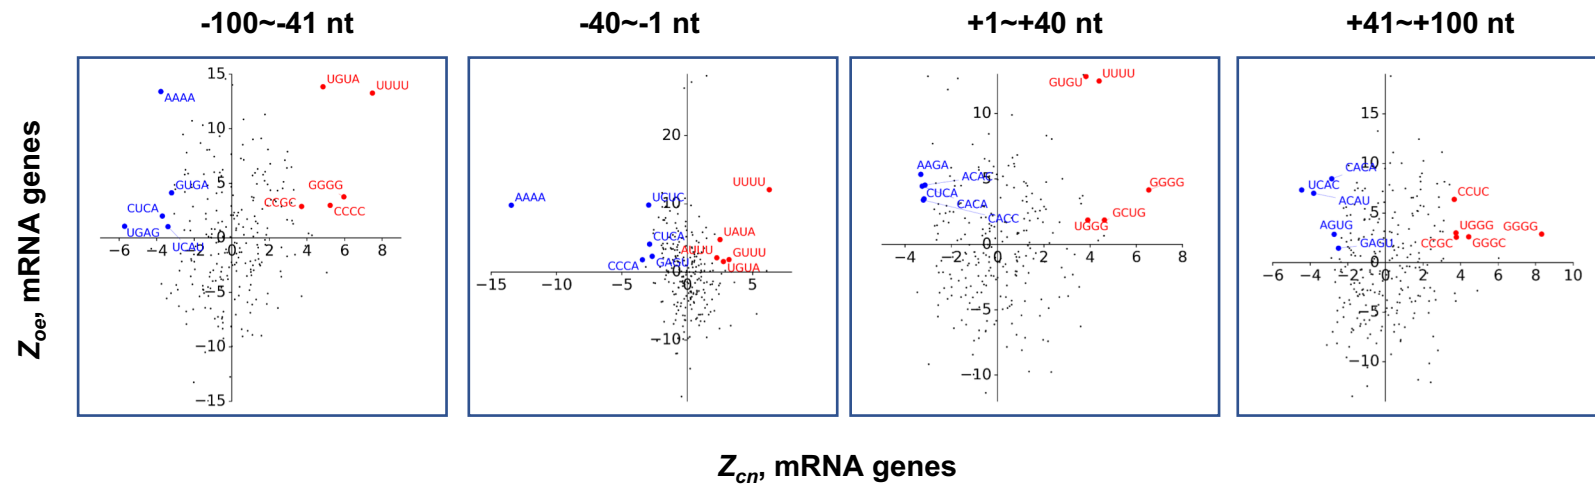

B

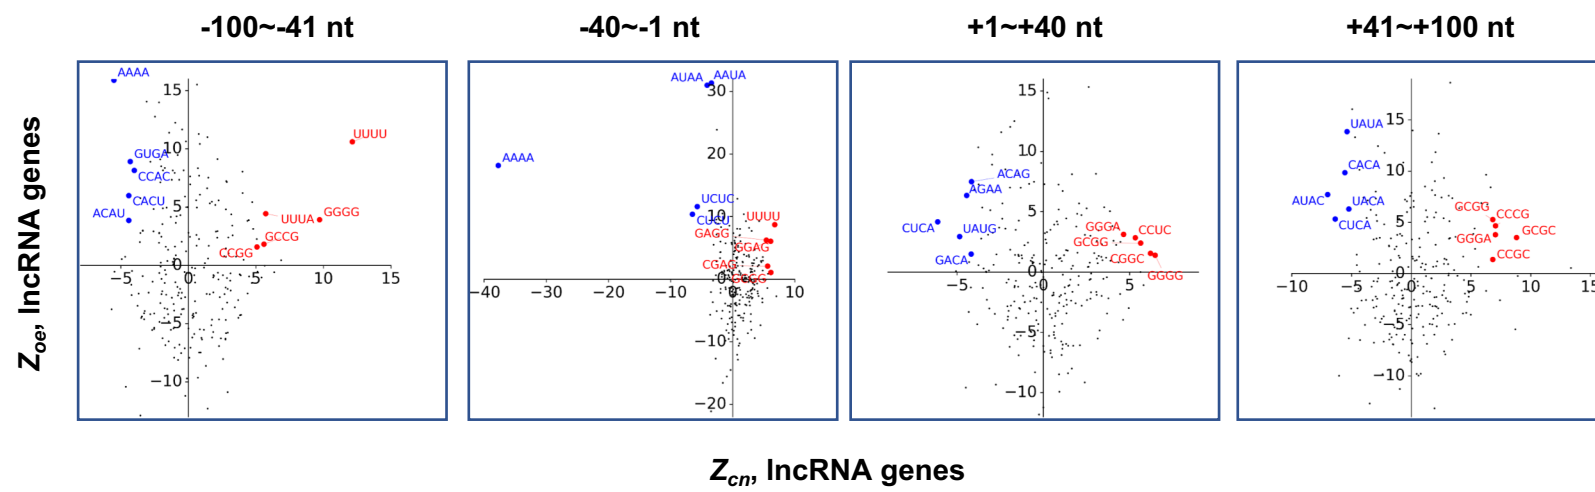

Figure S11. Comparison of sequence motifs between conserved and nonconserved PASs in four regions around the PAS. Data are shown as in Figure 7F, except that all four flanking regions (-100 to -41 nt, -40 to -1 nt, +1 to +40 nt, and +41 to +100 nt) of mRNA PASs (A) and lncRNA PASs (B) are shown. See Figure 7F legend for definitions of Z<sub>oe</sub> and Z<sub>cn</sub>.
