# Supplementary material for: A compendium of conserved cleavage and polyadenylation events in mammalian genes
Source: HighWire-hosted journal article supplement (doi:10.1101/gr.237826.118), 2018-08-24
Supplement: Supplemental_Table_S1.xlsx [file Supplemental_Table_S1.xlsx]

## Sheet: sample_list
Table S1. Samples used in this study.
Species	Sample source	No. of samples	No. of PAS reads
Mouse	C57 brain replicate 1	1	1594360
Mouse	C57 brain replicate 2	1	7322897
Mouse	C57 brain replicate 3	1	4963810
Mouse	FVB brain replicate 1	1	1509510
Mouse	FVB brain replicate 2	1	5972553
Mouse	C57 heart replicate 1	1	1726064
Mouse	C57 heart replicate 2	1	5060769
Mouse	C57 heart replicate 3	1	6746626
Mouse	FVB heart replicate 1	1	1594207
Mouse	FVB heart replicate 2	1	5402665
Mouse	C57 testis replicate 1	1	1814698
Mouse	C57 testis replicate 2	1	12688249
Mouse	C57 testis replicate 3	1	5110747
Mouse	FVB testis replicate 1	1	1727544
Mouse	FVB testis replicate 2	1	13322301
Mouse	3T3 L1 cells	27	76914757
Mouse	C2C12 cells	50	151835526
Mouse	Embryonic stem cells	7	7693131
Mouse	NIH3T3 cells	81	271767998
Mouse	Other brain mix	8	4913813
Mouse	Other testis mix	21	41301953
Mouse	Whole embryo	5	14168157
Mouse	Tissue mix	1	4210918
Mouse	Other heart mix	16	45031651
Mouse	muscle	4	32317324
Mouse	4T1 cells	5	17895197
Mouse	MH-S cells	3	11997437
Mouse	Mouse stem cells	3	5190212
Rat	rat brain replicate 1(3READS)	1	1100098
Rat	rat brain replicate 2(3READS+)	1	2801881
Rat	rat heart replicate 1(3READS)	1	1726500
Rat	rat heart replicate 2(3READS+)	1	1864363
Rat	rat testis replicate 1(3READS)	1	1271449
Rat	rat testis replicate 2(3READS+)	1	5141815
Rat	Tissue mix, adult	2	2764014
Rat	Whole body, neonatal	3	6946480
Human	A549 cells	1	1904382
Human	U87 cells	4	11605312
Human	HEK293 cells	7	17520283
Human	HeLa cells	25	78904647
Human	Embroyonic stem cells	7	20992021
Human	Tissue mix	3	11224423
Human	MCF7 cells	4	5836425
Human	293T cells	7	18322377
Human	HTR8 cells	5	22440198
Human	Neural stem cells	17	32565958
Human	cerebellum	4	28862575
Human	JEG3 cells	5	20985499
Human	LNCaP cells	6	18700102
Human	MCF10A cells	1	8133793
Human	MDA-MB-231 cells	1	10349391
Human	MDA-MB-468 cells	1	6670321
Human	Mammary epithelial cells	1	5095222
Human	MeWo cells	6	21647307
Human	SKBR3 cells	1	10525835
Human	T474 cells	1	13315686
