# Supplementary material for: A compendium of conserved cleavage and polyadenylation events in mammalian genes
Source: HighWire-hosted journal article supplement (doi:10.1101/gr.237826.118), 2018-08-24
Supplement: Supplemental_Table_S2.xlsx [file Supplemental_Table_S2.xlsx]

## Sheet: aUTR_vs_cUTR
Table S2. Tetramers enriched for cUTRs and aUTRs.
Tetramer	Enriched region	Significance Score
UUUU	aUTR	276.82
UAAA	aUTR	189.59
AUUU	aUTR	158.12
AAAU	aUTR	152.96
UUAA	aUTR	147.8
UUUA	aUTR	142.59
AAUU	aUTR	138.5
AUAA	aUTR	136.86
AAUA	aUTR	126.67
UAAU	aUTR	124.36
UAUU	aUTR	107.46
UUAU	aUTR	102.09
AUUA	aUTR	94.88
GUUU	aUTR	87.71
AAAA	aUTR	85.96
UGUU	aUTR	85.47
UUGU	aUTR	83.68
UUUG	aUTR	71.43
AGUA	aUTR	67.03
UAGU	aUTR	65.44
GUAA	aUTR	62.9
UUAG	aUTR	61.9
UUUC	aUTR	58.16
GUUA	aUTR	55.54
AGUU	aUTR	54.85
UGUA	aUTR	53.95
UAUA	aUTR	52.07
GUAU	aUTR	50.31
AUGU	aUTR	50.14
UAAG	aUTR	46.77
AAGU	aUTR	46.6
AUAU	aUTR	43.52
CUUA	aUTR	40.91
AAUG	aUTR	40.44
UAGA	aUTR	40.04
UUGA	aUTR	39.27
UUCU	aUTR	38.8
AUUG	aUTR	37.62
GAUU	aUTR	37.14
UUAC	aUTR	37.03
CAUA	aUTR	34.92
CUUU	aUTR	34.63
CAUU	aUTR	34
UACU	aUTR	33.43
UAUG	aUTR	32.98
AUAG	aUTR	32.97
UCUU	aUTR	31.34
UUCA	aUTR	30.64
GAAU	aUTR	28.73
GUAG	aUTR	28.47
UAAC	aUTR	28.04
AUUC	aUTR	26.81
UAUC	aUTR	25.65
UCUA	aUTR	25.27
CUAU	aUTR	24.31
UGAU	aUTR	24.02
UCAU	aUTR	23.83
GGUU	aUTR	23.43
UACA	aUTR	22.27
CUAA	aUTR	22.04
CAAU	aUTR	21.83
AUAC	aUTR	21.4
AUCU	aUTR	20.73
ACAU	aUTR	19.74
ACUA	aUTR	18.72
ACUU	aUTR	18.27
UCAA	aUTR	16.57
AAUC	aUTR	16.24
GGUA	aUTR	15.61
GUUG	aUTR	15.55
AAAC	aUTR	15.3
AGGU	aUTR	14.85
UAGC	aUTR	13.8
AGAU	aUTR	13.48
AAAG	aUTR	13.04
GAUA	aUTR	12.53
GUGU	aUTR	12.33
UAGG	aUTR	12.29
AUGA	aUTR	11.81
UGGU	aUTR	11.28
UGAA	aUTR	10.26
AACA	aUTR	10.21
AACU	aUTR	9.57
GUUC	aUTR	8.8
AUCA	aUTR	8.71
GAGU	aUTR	8.55
CUAG	aUTR	7.3
CAAA	aUTR	6.95
GCUA	aUTR	5.62
AGUG	aUTR	5.53
GUCA	aUTR	5.32
CAGU	aUTR	5.25
GCUU	aUTR	5.12
GAAA	aUTR	4.9
GUAC	aUTR	4.83
ACAA	aUTR	3.93
UUGG	aUTR	3.7
UGAG	aUTR	3.28
UGUG	aUTR	3.07
GUCU	aUTR	2.88
GUGA	aUTR	2.52
UUGC	aUTR	2.46
GCAU	aUTR	2.39
AGUC	aUTR	1.99
UGUC	aUTR	1.87
UCAG	aUTR	1.07
UACG	aUTR	0.61
CUUG	aUTR	0.56
AUGC	aUTR	0.42
CAUG	aUTR	0.24
CGUA	aUTR	0.2
CUGU	aUTR	0.06
CCCC	cUTR	-204.3
GCCC	cUTR	-189.24
GGAC	cUTR	-181.73
CCAG	cUTR	-146.47
GGCC	cUTR	-146.39
CUCC	cUTR	-140.54
CCUC	cUTR	-137.99
CCCU	cUTR	-134.53
CCCA	cUTR	-132.74
CCUG	cUTR	-124.43
CACC	cUTR	-121.26
CGCC	cUTR	-119.96
CCGG	cUTR	-116.86
CUGC	cUTR	-114.92
CCGC	cUTR	-113.35
ACCC	cUTR	-109.09
AGCC	cUTR	-108.91
GGGG	cUTR	-106.03
CCCG	cUTR	-103.34
GGGC	cUTR	-99.88
CCAC	cUTR	-98.66
GACC	cUTR	-94.25
CAGC	cUTR	-92.6
GGAG	cUTR	-91.52
GCCG	cUTR	-89.69
GGGA	cUTR	-85.31
GCCA	cUTR	-80.97
CGGG	cUTR	-79.31
CUGG	cUTR	-77.54
AGGG	cUTR	-76.74
GCCU	cUTR	-75.06
UCCC	cUTR	-74.81
CGGC	cUTR	-66.96
CGGA	cUTR	-66
GAGC	cUTR	-63.22
GCGC	cUTR	-62.18
GAGG	cUTR	-60.49
UGCC	cUTR	-60.31
GCUG	cUTR	-57.32
CAGG	cUTR	-56.99
GCGG	cUTR	-50.98
ACCG	cUTR	-48.05
GCAG	cUTR	-42.73
AGGA	cUTR	-42.62
CCGA	cUTR	-41.85
CGCG	cUTR	-41.68
CACG	cUTR	-41.46
GACG	cUTR	-41.29
CGAG	cUTR	-39.16
UCCG	cUTR	-38.8
ACGG	cUTR	-38.32
GCUC	cUTR	-38.11
ACAC	cUTR	-37.19
CGCU	cUTR	-35.99
UGGA	cUTR	-34.99
AGCG	cUTR	-34.05
AGAG	cUTR	-33.34
GAAG	cUTR	-32.21
GGCG	cUTR	-31.14
CGCA	cUTR	-31.02
UGGG	cUTR	-31
CGUC	cUTR	-30.21
CGAC	cUTR	-29.6
CCGU	cUTR	-28.82
CUCG	cUTR	-28.72
CAGA	cUTR	-27.48
GUCC	cUTR	-26.55
GAGA	cUTR	-26.09
GCAC	cUTR	-25.84
ACGC	cUTR	-25.57
GACA	cUTR	-24.68
AGGC	cUTR	-24.02
CUCU	cUTR	-23.34
UCGC	cUTR	-22.73
AGAC	cUTR	-22.55
ACCA	cUTR	-22.3
CACA	cUTR	-22.02
ACCU	cUTR	-21.06
UGCG	cUTR	-20.65
CGUG	cUTR	-20.42
UCGG	cUTR	-19.54
GGCU	cUTR	-18.02
CCAA	cUTR	-16.97
GCGA	cUTR	-16.18
ACUC	cUTR	-16.03
GACU	cUTR	-15.7
ACGA	cUTR	-15.1
CUUC	cUTR	-14.51
UGGC	cUTR	-14.25
GGCA	cUTR	-13.82
UCCA	cUTR	-13.8
UCCU	cUTR	-13.2
GGAA	cUTR	-12.62
CGGU	cUTR	-10.84
GUGG	cUTR	-10.42
CUCA	cUTR	-10.15
CGAA	cUTR	-10
CCUU	cUTR	-9.91
CAUC	cUTR	-9.2
CAAC	cUTR	-8.18
AUCG	cUTR	-8.04
GAAC	cUTR	-7.79
AACG	cUTR	-7.77
AACC	cUTR	-7.39
CACU	cUTR	-7.38
GUGC	cUTR	-7.33
GCGU	cUTR	-7
ACUG	cUTR	-6.98
CUGA	cUTR	-6.85
AGCA	cUTR	-6.8
UCUC	cUTR	-6.71
AAGG	cUTR	-6.07
GUCG	cUTR	-6.02
CAAG	cUTR	-5.77
ACAG	cUTR	-5.57
AAGC	cUTR	-5.24
AUCC	cUTR	-5.11
GGUC	cUTR	-5.02
GGUG	cUTR	-4.97
UCGA	cUTR	-4.72
AGCU	cUTR	-4.62
GGGU	cUTR	-4.38
ACGU	cUTR	-4.35
AAGA	cUTR	-3.75
UGCA	cUTR	-3.45
UCAC	cUTR	-3.09
GAUG	cUTR	-3.09
CCAU	cUTR	-2.86
GGAU	cUTR	-2.43
AUGG	cUTR	-2.06
UUCG	cUTR	-2.01
CGAU	cUTR	-1.79
UCGU	cUTR	-1.67
UUCC	cUTR	-1.22
UGAC	cUTR	-1.13
UGCU	cUTR	-1.13
CGUU	cUTR	-0.88
CUAC	cUTR	-0.74
CCUA	cUTR	-0.5
AGAA	cUTR	-0.28
UCUG	cUTR	-0.25
GCAA	cUTR	-0.11
GAUC	cUTR	-0.06
UACC	cUTR	-0.05
