# Supplementary material for: A compendium of conserved cleavage and polyadenylation events in mammalian genes
Source: HighWire-hosted journal article supplement (doi:10.1101/gr.237826.118), 2018-08-24
Supplement: Supplemental_Table_S3.xlsx [file Supplemental_Table_S3.xlsx]

## Sheet: Distal_vs_Proximal_PAS
Table S3. Tetramers enriched for proximal or distal PASs.
	Region:-100~-41		Region: -40~-1		Region: +1~+40		Region: +41~+100
Tetramer	Zdp	Zoe	Zdp	Zoe	Zdp	Zoe	Zdp	Zoe
AAAA	14.03	25.08	15.74	-13.57	-16.38	25.91	-12.47	28.66
AAAC	3.99	0.1	5.94	3.89	-5.68	-2.89	-2.48	3.1
AAAG	1.88	1.74	6.78	10.93	-6.61	2.94	-0.25	-3.28
AAAU	15.79	16.68	21.05	20.45	-6.81	7.65	-4.34	18.22
AACA	0.82	1.56	1.18	-0.46	-3	3.11	1.83	3.39
AACC	-2.98	-20.47	-0.81	-14.49	-2.54	-11.85	1.54	-17.42
AACG	-3.69	-5.42	2.73	0.87	0.97	-0.85	0.91	-6.35
AACU	1.87	-8.13	0.41	-12.68	-3.24	-12.27	-1.94	-8.73
AAGA	-8.12	9.62	-3.92	4.41	-3.29	7	0.11	3.4
AAGC	-4.31	-5.97	-0.5	-4.43	-1.99	-2.81	3.07	-7.74
AAGG	-5.39	-9.17	-4.55	-6.93	-2.74	-5.76	5.49	-15.05
AAGU	5.29	-12.67	4.52	-8.68	-2.33	-9.17	1.53	-9.36
AAUA	16.31	13.05	28.53	65.75	-5	14	-3.27	18.4
AAUC	0.68	-14.33	0.26	-20.95	-2.28	-14.09	2	-14.24
AAUG	9.48	4.09	2.33	-7.85	-3.49	-2.3	-2.95	-1.99
AAUU	10.7	-18.78	8.28	-36.23	-3.52	-18.91	-2.63	-12.5
ACAA	1.43	-8.24	1.98	-8.12	-4.09	-2.18	0.39	-9.55
ACAC	-3.32	12.31	-3.22	12.77	-3.69	8.26	3.09	18.83
ACAG	-5.8	21.61	-5.75	24.08	-3.52	12.94	3.72	17.71
ACAU	3.43	9.04	0.32	11.77	-0.36	5.33	2.18	12.78
ACCA	-2.82	-6.65	-2.44	-6.2	-4.93	-3.65	3.3	-7.39
ACCC	-8.33	-9.77	-6.4	-5.69	-2.66	-5.62	0.83	-8.28
ACCG	-3.51	-3.92	-2.75	-1.03	-0.71	-0.97	-2.02	-3.81
ACCU	-4.98	-10.57	-1.72	-7.5	-3.48	-11.08	0.75	-8.04
ACGA	-4.9	-4.06	-1.51	-1.75	-1.32	-3.65	-2.1	-5.96
ACGC	-4.05	1.74	-2.47	1.97	-0.21	1.63	1.16	-1.12
ACGG	-4.14	2.01	-0.66	1.95	-0.96	0.61	2.65	-1.35
ACGU	0.07	4.81	-0.02	8.02	1.46	7.75	-0.19	8.62
ACUA	0.35	-10.39	-0.75	-15.65	-1.7	-6.5	0.08	-9.79
ACUC	-3.92	-1.56	-3.37	0.73	-1.3	-2.49	2.69	-1.43
ACUG	-2.31	13.52	-2.17	12.63	0.81	9.69	-2.49	7.74
ACUU	3.69	-5.31	1.18	-2.29	-0.77	-8.82	-2.38	-6.29
AGAA	-6.84	18.07	-3.83	6.48	-3.97	15.21	2.37	16.35
AGAC	-10.31	5.07	-6.44	7.6	-2.74	4.2	2.05	1.25
AGAG	-7.67	13.45	-8.41	16.11	-0.43	11.91	2.62	11.86
AGAU	-2.08	-0.21	-2.41	-1.55	-3.82	-5.04	3.89	-3.6
AGCA	-7.29	6.66	-0.92	1.96	-0.45	2.74	5.18	3.26
AGCC	-10.8	4.52	-5.07	3.54	-4.35	4.03	1.84	1.35
AGCG	-7.89	1.66	-3.35	0.65	1.64	4.6	0.55	0.93
AGCU	-5.64	-2.88	-3.57	-4.84	-0.33	-9.14	1.88	-3.47
AGGA	-11.78	9.45	-7.55	4.43	-1.84	6.03	5.99	4.06
AGGC	-7.69	-2	-5.23	-0.87	1.4	-1.05	5.2	-1.08
AGGG	-11.24	7.72	-9.12	-0.36	-0.3	4.69	6.27	2.26
AGGU	-1.76	-19.84	-3	-11.76	0.35	-16.78	7.62	-15.49
AGUA	4.22	-4.2	0.47	-3.31	-1.71	1.7	2.75	1.26
AGUC	-2.85	-8.32	-1	-3.9	2.52	-2.8	2.13	-5.64
AGUG	-0.19	-1.6	-2.08	3.49	1.2	2.8	3.61	1.67
AGUU	4.03	-18	1.72	-10.67	0.77	-16.4	0.99	-12.9
AUAA	16.41	4.6	28.13	61.59	-3.43	6.31	-2.95	10.59
AUAC	6.95	5.01	0.5	6.22	-2.14	6.44	1.22	8.9
AUAG	2.57	-10.66	-3.26	-13.38	-1.26	-2.51	1.81	-6.5
AUAU	12.98	36.6	-1.47	18.56	-8.64	23.25	-5.85	34.9
AUCA	1.11	-6.08	0.26	-11.45	-2.34	-6.26	3.1	-6.66
AUCC	-5.21	-15.9	-2.26	-13.94	-0.8	-13.49	3.13	-15.13
AUCG	-3.45	-7.01	-5.3	-6.72	-1.07	-7.16	0.16	-7.48
AUCU	1.14	-4.22	-0.27	-10.89	1.63	-7.95	0.28	-5.76
AUGA	0.23	-4.64	1.92	-6.37	-2.28	-0.9	0.96	-1.52
AUGC	2.04	-8.68	-0.39	-7.12	-3.16	-7.07	0	-7.74
AUGG	-2.24	-11.94	-1.56	-5.74	-1.12	-6.29	2.54	-12.57
AUGU	13.25	24.67	-0.51	4.68	-2.17	5.86	-6.95	12.64
AUUA	10.79	-8.95	6.1	-0.24	-2.48	1.03	-0.52	-3.02
AUUC	4.81	-9.62	2.91	-8.9	1.16	-6.11	1.23	-4.66
AUUG	7.69	-21.81	1.73	-22.12	-0.58	-16.13	-2.39	-22.36
AUUU	14.5	24.15	4.83	4.06	-2.85	19.55	-7.96	21.84
CAAA	1.78	-12.65	2.46	-31.66	-5.66	-6.36	0.71	-14.5
CAAC	-5.35	-15.73	-1.46	-12.28	-1.51	-12.15	0.1	-17.37
CAAG	-7.01	-12.21	-6.46	-8.71	-2.4	-9.16	4.1	-17.31
CAAU	4.73	-28.93	11.59	-12.38	-2.02	-24.99	0.7	-31.08
CACA	-5	11.65	-3.69	12.21	-2.96	10.77	4.86	21.09
CACC	-8.1	8.63	-6.37	4.89	-3.99	1.38	1.4	6.92
CACG	-3.37	12.89	-2.65	9.6	-0.93	8.98	1.2	12.37
CACU	-3.03	4.19	-3.18	7.63	-1.35	0.2	1.51	2.82
CAGA	-9.54	22.18	-7.35	21.99	-5.63	14.24	5.57	16.48
CAGC	-12.97	27.53	-5.44	16.46	-1.83	11.89	4.08	19.63
CAGG	-11.57	12.57	-7.72	11.65	-0.72	5.35	7.24	11.62
CAGU	-1.91	9.32	-2.24	18.18	-0.79	6.23	1.49	10.62
CAUA	6.03	-6.59	-0.04	-6.95	-1.6	0.73	2.79	-0.06
CAUC	-6.55	2.7	-3.86	0.62	1.34	-0.78	2.12	1.8
CAUG	1.35	-4.25	-2.96	2.67	-0.2	-0.19	0.72	-3.04
CAUU	6.03	-2.25	2.59	9.06	2.92	2.45	0.36	1.16
CCAA	-5.9	-23.09	-1.53	-18.17	-4.42	-14.57	2.97	-24.68
CCAC	-8.32	10.33	-6.17	8.9	-3.12	5.62	2.53	9.84
CCAG	-13.29	17.54	-8.38	15.89	-3.03	12.84	4.14	13.05
CCAU	-2.69	-11.4	-2.52	-5.68	-2.25	-11.6	-0.54	-10.05
CCCA	-11.01	-0.13	-6.11	0.79	-4.85	2.02	0.99	1.36
CCCC	-12.7	14.81	-10.61	9.46	-6.45	8.88	-2.86	9.95
CCCG	-7.6	11.55	-4.69	4.55	-1.11	8.03	-0.01	10.38
CCCU	-12.57	-1.44	-11.16	-1.49	-3.01	-5.56	-1.17	0.7
CCGA	-7.05	-5.19	-3.42	-1.63	-0.26	-1.84	0.04	-4.64
CCGC	-6.89	13.86	-4.55	4.82	-1.75	6.7	0.6	11.84
CCGG	-7.49	6.32	-4.18	2.9	0.85	2.17	2.21	3.91
CCGU	-2.99	0.67	-2.27	1.39	0.55	1.05	-1.04	1.42
CCUA	-1.53	-22.26	-2.8	-19.98	-0.04	-14.86	3.2	-19.32
CCUC	-12.66	21.87	-10.26	14.13	-1.4	13.69	-1.8	19.01
CCUG	-10.71	12.19	-6.69	11.63	2.17	12.76	2.64	13.28
CCUU	-4.57	-16.23	-5.13	-5.06	-1.83	-12.59	-1.34	-14.72
CGAA	-4.6	-12.39	-2.26	-10.14	-0.47	-9.5	-1.07	-10.78
CGAC	-4.78	-1.84	-1.24	1.99	-0.91	-0.44	-1.31	-4.59
CGAG	-6.98	1.25	-2.55	2.7	-0.12	0.86	-0.62	-0.35
CGAU	-1.87	-10.31	-1.62	-6.07	0.36	-7.82	0.86	-11.9
CGCA	-4.26	-1.61	-1.26	-4.04	-3.05	-2.39	1.02	-1.38
CGCC	-8.13	11.76	-6.64	5.92	1.12	7.24	0.08	8.73
CGCG	-5.13	12.2	-3.14	7.7	0.92	11.08	0.9	12.48
CGCU	-6.26	-0.45	-2.75	0.24	-1.52	-2.15	-0.44	-2.61
CGGA	-7.62	0.17	-3.02	-1.66	-0.01	-3.84	3.49	-5.29
CGGC	-7.8	9.05	-4.47	1.45	2.4	6.41	2.73	6.71
CGGG	-5.91	14	-3.83	5.09	2.6	7.77	5.76	13.5
CGGU	-3.62	-7.7	-2.96	-1.92	0.56	-5.67	-0.31	-5.46
CGUA	-0.38	-5.42	-0.99	-5.77	-1.16	-0.85	0.04	-2.48
CGUC	-3.09	3.37	-1.5	2.55	1.23	5.1	-1.42	3.84
CGUG	-2.11	12.67	-2.53	8.45	2.81	12.63	-1.1	15.47
CGUU	-0.85	-8.09	1.1	0.59	2.68	-5.8	-3.5	-6.04
CUAA	3.06	-19.55	1.59	-26.68	-0.33	-13.86	1.1	-16.82
CUAC	-2.03	-3.84	-0.54	-6.89	-0.43	-4.4	1.64	-5.86
CUAG	-2.86	-17.62	-3.54	-13.32	-0.45	-11.5	2.58	-15.29
CUAU	3.95	-9.12	-0.52	-11.71	-1.64	-10.35	-2.99	-12.16
CUCA	-3.91	0	-2.21	2.9	0.87	0.63	3.9	2.87
CUCC	-11.96	19.64	-9.43	13.17	1.36	12.04	-0.25	16.36
CUCG	-5.32	1.19	-4.58	3.66	1.13	2.08	0.58	2.71
CUCU	-7.33	15.88	-7.3	13.51	4.69	9.68	-1.73	13.08
CUGA	-5.5	-0.13	-2.38	6.48	1.78	2.75	2.94	5.21
CUGC	-9.46	19.05	-5.77	15.14	1.1	15.33	-0.39	16.95
CUGG	-10.71	10.21	-6.52	13.01	5.35	11.75	5.12	11.62
CUGU	5.93	32.52	-0.6	19.95	7.11	20.39	-6.6	21.15
CUUA	2.59	-19.67	0.52	-18.12	-0.97	-11.88	2.14	-14.33
CUUC	-6.42	8.06	-2.45	10.14	4.28	2.79	-0.94	5.49
CUUG	1	-20.43	-1.93	-3.85	4.22	-12.87	-0.89	-17.65
CUUU	4.2	-5.8	-0.81	4.98	4.72	-2.81	-6.27	-5.43
GAAA	-0.84	17.01	0.08	-6.78	-6.56	7.91	-0.38	14.53
GAAC	-6.21	-5.86	-3.51	-5.71	-1.04	-0.66	2.55	-5.54
GAAG	-13.01	11.73	-10.05	1.17	-1.43	5.94	5.95	8.12
GAAU	3.59	-4.96	1.69	-3.48	-1.18	-4.88	0.08	-2.92
GACA	-6.87	5.57	-3.61	6.42	-2.43	2.66	3.94	4.46
GACC	-9.43	-6.41	-5.18	-1.24	-4.48	-5.05	0.42	-7.33
GACG	-4.08	2.74	-3.51	4.72	0.62	2.15	-0.85	0.52
GACU	-6.69	-0.9	-4.26	3.19	1.3	4.26	-1.1	-3.53
GAGA	-7.95	13.8	-5.04	14.29	-0.01	11.13	3.61	12.91
GAGC	-10.07	5.42	-5.38	6.62	0.17	2.24	2.05	4.4
GAGG	-13.28	16.76	-8.04	11.46	2.83	10.37	7.45	15.8
GAGU	-1.83	-10.89	-4.25	-0.09	5.55	0.05	5.15	-5.54
GAUA	2.1	-6.3	-2.64	-9.59	-3.2	-5.58	1.83	-4.58
GAUC	-4.11	-14.4	-1.69	-7.17	0.28	-14.82	2.15	-15.17
GAUG	-4.89	1.67	-3.6	-0.49	-0.94	-2	2.89	-2.16
GAUU	3.58	-18.11	0.56	-8.06	-0.83	-11.48	-0.12	-15.44
GCAA	-1.77	-16.98	0.76	-15.67	-3.33	-12.75	0.66	-20.92
GCAC	-5.26	5.78	-2.75	6.49	-3.84	1.32	0.34	4.83
GCAG	-10.73	19.49	-5.68	13.83	-0.07	8.13	7.61	19.22
GCAU	0.38	-5.39	0.07	-2.26	0.97	-1.87	1.54	-4.58
GCCA	-10.93	2.15	-6.73	2.69	-3.23	-1.26	1.73	-0.85
GCCC	-12.67	7.39	-7.33	3.89	-4.39	4.15	-0.04	7.24
GCCG	-7.7	10.7	-4.23	4.64	0.57	5.83	1.77	10.52
GCCU	-7.61	0.2	-7.94	4.12	2.86	7.11	2.77	-1.23
GCGA	-3.36	-5.64	-3.57	-3.72	1.19	-1.95	0.9	-5.71
GCGC	-7.04	6.23	-2.31	2.24	0.62	4.85	-0.71	5.01
GCGG	-7.33	9.47	-3.82	2.07	3.53	6.91	4.5	12.15
GCGU	-2.85	0.75	-0.21	0.6	1.83	4.6	-1.26	1.88
GCUA	0.17	-13.89	0.32	-14.42	-1.02	-11.58	0.05	-14.77
GCUC	-7.84	1.24	-3.12	2.48	4.44	0.63	1.68	2.37
GCUG	-5.84	18.65	-6.13	14.33	2.78	9.34	1.75	19.14
GCUU	0.88	-16.17	-0.56	-5.88	4.88	-10.5	0.11	-14.5
GGAA	-6.84	12.36	-6.46	3.01	-1.04	5.08	5.1	4.85
GGAC	-10.11	5.42	-7.63	3.52	-2.8	1.53	0.68	-0.97
GGAG	-14.23	19.71	-7.44	13.96	3.41	14.81	8.28	16.01
GGAU	-2.86	-10.92	-3.62	-6.87	-0.44	-10.7	3.62	-12.77
GGCA	-6.13	-1.98	-5.63	-0.5	1.09	-2.63	5.36	-2.36
GGCC	-13.23	5.53	-9.98	5.59	1.12	4.6	5	5.32
GGCG	-6.93	8.66	-2.16	3.12	0.68	4.49	4.91	8.43
GGCU	-7.28	-3.97	-2.54	-2.57	7.77	0.94	3.42	-4.27
GGGA	-8.28	16	-9.36	7.59	2.22	13.15	6.88	12.84
GGGC	-10.86	13.91	-7.76	2.18	1.81	7.69	7.49	8.55
GGGG	-11.27	24.1	-9.42	9.42	3.97	20.18	6.58	14.4
GGGU	-5.05	-11.39	-4.42	-8.86	3.71	-9.33	4.92	-6.11
GGUA	2.88	-18.52	-0.62	-14.96	1.41	-12.21	4.09	-11.92
GGUC	-4.47	-12.01	-4.06	-5.58	3.77	-6.92	5.04	-8.1
GGUG	-5.51	-3.57	-4.16	2.01	6.68	-0.5	5.61	4.39
GGUU	2.48	-24.78	-1.49	-12.14	2.63	-22.55	-0.53	-24.17
GUAA	12.61	6.98	0.49	-5.24	-4.57	-3.22	-0.72	-1.04
GUAC	4.89	10.51	-0.37	3.96	-3.24	0.8	-2.18	0.94
GUAG	0.05	-7.48	-1.14	-9.44	0.58	-4.75	1.89	-3.72
GUAU	12.78	24.17	0.72	6.33	-1.75	12.04	-5.66	12.93
GUCA	0.69	-5.24	-1.52	-0.21	2.96	-3.35	0.77	-4.46
GUCC	-5.15	-4.8	-4.8	-2.86	0.6	-2.25	2.03	-3.01
GUCG	-3.83	-4.45	-0.05	-3.46	0.74	-2.89	0.49	-4.9
GUCU	2.17	-1.42	0.47	0.13	11	11.14	-1.07	1.38
GUGA	-0.58	0.3	-2.58	2.02	1.58	1.22	3.25	3.08
GUGC	0.3	1.8	-1.77	3.83	1.77	0.12	-0.25	5.38
GUGG	-4.92	5.95	-4.06	7.62	8.12	10.53	4.05	12.55
GUGU	7.49	16.44	-1.31	12.17	10.97	30.9	-6.67	22.52
GUUA	7.19	-13.32	2.47	-15.08	1.27	-14.01	-1.57	-11.33
GUUC	1.47	-8.68	1.68	-1.3	1.71	-12	-0.13	-8.64
GUUG	4.02	-21.29	-1.45	-9.43	3.39	-18.56	-2.09	-19.3
GUUU	10.12	0.83	-0.33	8.18	2.78	0.54	-8.96	-0.52
UAAA	20.71	17.16	26.04	72.23	-6.96	10.81	-6.81	19.15
UAAC	3.62	-10.44	-1.79	-21.88	-0.87	-7.5	1.96	-8.49
UAAG	4.41	-18.73	-1.62	-25.13	1.11	-10.04	1.68	-15.48
UAAU	12.1	-2.05	9.99	-13.73	-2.7	-4.46	-3.09	1.7
UACA	6.43	13.2	0.15	11.6	-3.01	8	-1.32	7.63
UACC	1.53	-11.48	0.39	-9.14	-2.06	-7.11	1.73	-8.45
UACG	-0.84	-4.25	-2.39	-2.95	-0.99	-2.1	-0.08	-4.69
UACU	5.82	2.23	2.37	-4.22	0.79	-0.48	-0.61	1.23
UAGA	1.72	-9.57	-3.19	-10.42	-1.11	-4.41	2.07	-4.2
UAGC	-1.81	-15.92	-0.21	-14.4	-0.57	-11.34	1.1	-13.05
UAGG	-2.82	-24.29	-4.18	-17.91	0.1	-16.8	3.99	-19.53
UAGU	3.7	-18.04	-1.03	-20.42	1.06	-14.45	1.46	-12.45
UAUA	13.45	36.78	-2.97	16.92	-6.98	24.17	-6.94	32.57
UAUC	5.72	-5.15	-0.16	-13.23	-0.61	-4.93	-0.12	-5.19
UAUG	8.75	1.35	1.26	-9.52	-2.98	-1.43	-5.09	-1.41
UAUU	17.08	26.76	2.93	13.5	-3.92	26.99	-8.28	20.09
UCAA	1.84	-21.6	7.94	-20.83	0.87	-21.65	1.55	-24.97
UCAC	-2.31	4.73	-3.12	4.6	0.79	1.15	3.4	6.4
UCAG	-5.84	11.44	-3.24	14.27	-0.85	4.59	2.97	9.72
UCAU	6.4	-2.75	-1.21	0.85	3.85	6.1	1.79	2.41
UCCA	-6.47	-7.48	-1.58	-5.63	-0.5	-7.28	4.02	-8.89
UCCC	-10.75	6.38	-8.34	4.06	-1.56	1.8	-0.86	8.47
UCCG	-5.03	-3.98	-2	-0.26	0.58	-3.65	0.14	-3.86
UCCU	-5.62	1.88	-4.55	1.47	1.91	3.07	0.53	2.46
UCGA	-3.46	-10.35	-0.53	-6.56	-1.58	-10.09	-0.94	-12.06
UCGC	-5.93	-5.73	-4.14	-2.42	-0.9	-3.91	0.58	-5.56
UCGG	-5.53	-3.68	-5.82	-2.11	2.25	-4.44	3.06	-4.73
UCGU	-0.64	-5.32	-2.69	-3.17	2.06	-4.04	-2.89	-1.96
UCUA	3.86	-5.23	1.15	-11.56	-0.25	-7.09	-1.17	-7.8
UCUC	-4.27	16.4	-5.38	16.91	5.71	11.75	0.44	15.16
UCUG	1.29	18.86	0.24	15.87	8.32	20.23	-1.82	15.07
UCUU	1.83	-2.19	-0.84	2.78	8.81	2.39	-3.34	0.72
UGAA	2.15	-4.43	1.74	-8.77	-3.62	-4.51	-0.62	-2.31
UGAC	-2	-7.61	-0.62	-1.74	1.94	-1.53	0.56	-4.02
UGAG	-5.3	-9.08	-3.03	-1.79	5.33	-1.33	6.2	-2.2
UGAU	2.74	-17.47	-0.01	-13	0.04	-14.57	-1.36	-12.45
UGCA	-0.92	-5.47	0.65	-5.1	-3.24	-6.47	-0.71	-4.49
UGCC	-7.03	-1.9	-6.78	2.55	-1.12	0.03	-1.21	-0.72
UGCG	-1.41	-5.42	-1.63	-5.46	2.63	0.83	-1.87	-2.13
UGCU	2.63	-4.62	-2	-0.45	2.47	-6.39	-1.28	-0.11
UGGA	-7.22	-0.58	-4.3	2.96	0.23	-3.3	2.08	-6
UGGC	-7.22	-9.88	-3.37	0.67	6.09	-1.18	2.39	-6.3
UGGG	-7.49	0.41	-8.13	-1.42	5.14	6.42	7.42	5.08
UGGU	2.76	-19.33	-1	-7.06	7.32	-10.95	-0.08	-13.58
UGUA	17.54	50.04	0.31	11.63	-6.19	12.29	-10.88	18.48
UGUC	3.24	3.59	0.2	3.61	8.29	9.61	-3.74	3.5
UGUG	7.21	20.16	-1.26	11.96	10.85	30.28	-7.1	25.91
UGUU	12.83	5.24	0.24	2.72	4	-3.17	-10.51	2.14
UUAA	12.41	-2.08	8.68	0.24	-3.46	2.91	-4.77	4.72
UUAC	5.49	-6.03	1.74	-6.01	0.8	-3.24	-0.95	-4.37
UUAG	1.14	-28.67	-1.94	-23.57	0.28	-22.2	2.64	-20.58
UUAU	15.24	12.67	2.27	-2.43	-3.08	17.47	-7.08	11.95
UUCA	2.85	-2.39	4.45	1.01	3.42	-2.17	1.7	-2.45
UUCC	-3.9	-1.31	-1.4	3.63	-0.31	-1.29	0.51	0.7
UUCG	-1.82	-13.67	-1.46	-6.6	1.25	-11.86	-1.83	-12.98
UUCU	5.89	13.36	1.3	15.83	7.25	11.62	-3.21	11.97
UUGA	4.72	-29.45	1.18	-19.09	1.37	-20.68	-1.6	-22.99
UUGC	1.75	-23.36	-0.5	-10.1	0.26	-17.2	-3.43	-17.2
UUGG	-0.81	-29.14	-3.51	-10.85	5.56	-19.68	0.71	-26.86
UUGU	15.27	7.27	0.33	-0.81	2.11	-6.43	-13.15	-3.75
UUUA	14.11	17.46	3.95	6.25	-3.44	20.23	-9.69	18.93
UUUC	5.49	12.36	2.61	19.53	5.59	15.03	-1.52	11.66
UUUG	10.32	-9.16	-0.17	-3.53	2.38	-11.15	-10.8	-11.72
UUUU	15.46	37.59	1.48	25.53	-7.81	26.5	-23.15	33.82
