# Supplementary material for: A compendium of conserved cleavage and polyadenylation events in mammalian genes
Source: HighWire-hosted journal article supplement (doi:10.1101/gr.237826.118), 2018-08-24
Supplement: Supplemental_Table_S4.xlsx [file Supplemental_Table_S4.xlsx]

## Sheet: Conserved_vs_nonconserved_PAS
Table S4. Tetramers enriched for conserved or nonconserved PASs.
	Region:-100~-41				Region: -40~-1				Region: +1~+40				Region: +41~+100
	mRNA		lncRNA		mRNA		lncRNA		mRNA		lncRNA		mRNA		lncRNA
kmer	Zcn	Zoe	Zcn	Zoe	Zcn	Zoe	Zcn	Zoe	Zcn	Zoe	Zcn	Zoe	Zcn	Zoe	Zcn	Zoe
AAAA	-3.78	13.41	-5.52	15.9	-13.46	9.79	-37.73	18.17	-1.72	12.68	-2.44	11.59	-0.41	13.27	0.11	13.97
AAAC	-1.07	0.35	-0.29	-0.57	0.6	-1.61	-1.65	-5.05	-0.36	-0.95	-0.1	-0.02	-0.59	1.11	-1.72	1.31
AAAG	-2.02	-1.52	2.26	-4.64	5.31	-6.15	1.69	-6.63	-2.56	3.09	-2.88	0.6	-0.15	-1.84	0.58	-3.16
AAAU	-2.12	10.73	-2.09	9.1	-0.13	6.71	-1.95	-1.56	0.61	2.03	-1.45	1.43	-0.02	9.49	-0.67	10.84
AACA	-2.21	0.68	-2.05	0.24	-0.35	-1.32	-0.48	-4.24	-2.72	1.42	-0.89	2.44	-2.69	-0.72	-2.68	0.94
AACC	-0.91	-7.42	-1.92	-6.25	-1.04	-7.64	-0.8	-7.17	1.03	-5.42	1.04	-5.75	0.81	-7.79	-2.31	-6.65
AACG	-0.31	-1.05	3.12	-2.16	1.29	-1.61	3.13	-1.64	-1.01	-0.58	2.62	0.44	-1.27	-0.67	1.94	-2.33
AACU	1.29	-5.65	0.43	-5.89	1.32	-7.28	-1.02	-8.16	0.62	-6.06	-1.95	-6.2	0	-4.93	-0.7	-6.43
AAGA	-1.38	1.73	-1.56	0.38	1.91	-1.79	0.2	-2.73	-3.32	5.35	-3.6	2.77	-2	1.6	-2.85	-0.78
AAGC	0.15	-5.64	2.78	-5.82	0.5	-4.39	1.1	-5.79	0.13	-3.97	0.7	-3.64	-0.18	-6.47	0.09	-5.37
AAGG	0.83	-5.9	2.91	-5.77	3.33	-7.89	1.32	-6.13	-1.38	-2.57	-1.35	-3.05	0.46	-6.99	-0.55	-5.98
AAGU	-2.1	-4.26	-0.55	-4.19	1.64	-6.26	-0.14	-6.89	-1.21	-4.48	-0.48	-5.21	-2.44	-3.54	-0.4	-4.58
AAUA	-2.41	7.81	-0.8	9.47	0.33	27.85	-3.42	31.37	-0.23	5.46	-1.93	7	-0.52	9.56	-4.71	13.31
AAUC	-2.82	-6.26	-3.64	-7.15	-0.77	-11.97	-0.33	-14.52	-1.89	-6.41	-3.83	-4.33	-0.51	-5.27	-1.81	-5.91
AAUG	0.37	1.26	-1.67	-0.78	1.15	-6.22	0.17	-8.92	-0.84	-1.11	-0.78	-1.2	-0.82	-0.75	1.3	-1.73
AAUU	-0.04	-8.14	-3.24	-3.92	0.22	-14.19	-1.59	-16.57	-1.07	-8.43	-1.43	-6.9	-1.5	-5.61	-1.84	-6.45
ACAA	-1.55	-4.39	-3.69	-2.42	0.67	-6.94	-2.58	-5.1	-0.07	-2.68	-3.31	-0.01	-2.56	-4.84	-5.03	-3.43
ACAC	-0.68	5.14	-0.5	2.03	-0.9	7.19	-1.87	8.32	-3.14	4.53	0.13	2.7	-1.63	7.3	-4.34	10.13
ACAG	-1.2	8.08	-1.16	8.15	-0.17	10.81	1.79	10.39	-0.81	5.69	-4.16	7.49	-1.65	5.86	-3.65	7.14
ACAU	-0.53	4.18	-4.42	3.86	-2.19	8.01	-2.74	9.02	-2.07	2.51	-0.46	-0.88	-3.82	7	-2.94	5.71
ACCA	0.03	-2.51	-3.39	-0.92	-1.41	-1.47	0.08	-2.77	-1.54	-1.94	-1.07	-2.48	-1.48	-3.35	-4.16	-2.64
ACCC	0.98	-2.15	1.14	-5.53	-2.57	-1.59	-0.51	0.28	-1.24	-1.46	0.59	-1.72	0.83	-2.63	2.25	-3.4
ACCG	1.39	-1.45	2.22	-1.21	2.42	-1.99	0.9	0.7	-1.23	1.65	2.03	-1.07	1.74	-3.32	1.56	-3.03
ACCU	-0.25	-3.47	-1.65	-2.52	-0.87	-3.24	-0.12	-2.51	0.52	-4.72	0.23	-3.05	-0.57	-3	-2.11	-2.05
ACGA	0.35	-1.8	4.38	-2.41	0.9	-0.97	4.01	-1.92	1.11	-1.65	0.92	-2.56	-1.2	-3.15	0.25	-0.51
ACGC	0.07	2.08	4.08	0.48	1.01	-0.08	3.97	0.01	0.38	1.68	0.79	4.19	0.65	2.87	3.11	-0.19
ACGG	0.6	0.99	3.11	-0.68	0.36	1.13	0.66	3.27	-0.1	0.47	1.91	3.77	0.21	-0.85	1.83	0.66
ACGU	0.34	2.32	3.27	2.58	-1.86	4.16	1.64	2.69	-0.64	2.93	1.41	1.78	0.38	4.5	2.73	0.94
ACUA	-0.47	-3.86	-2.83	-4.19	-0.83	-6.14	0.19	-8.23	0.61	-4.29	-3.27	-2.3	0.6	-5.09	-1.65	-6.23
ACUC	-1.36	0.32	-3.38	2.96	-1.45	0.1	-1.72	1.22	-0.17	-2.42	-3.15	0.13	0.06	-1.23	-4.56	0.82
ACUG	1.06	3.76	-0.88	4.21	0.41	5.43	0.35	5.85	0	4.95	0.99	1.15	0.23	3.13	0.1	1.65
ACUU	1.16	-2.97	0.38	-4.38	1.25	-2.6	1.1	-4	-0.49	-3.14	2.12	-6.07	-1.84	-2.19	0.98	-5.21
AGAA	-1.45	5.19	-0.09	5	2.62	-0.26	-0.1	0.92	-2.01	5.86	-4.44	6.35	-1.11	4.4	-1.16	5.03
AGAC	-0.73	1.39	-2.17	2.8	-2.56	6.18	0.38	5.69	-0.64	1.16	-3.2	3.09	-1.61	0.7	-1.87	2.73
AGAG	-1.29	3.56	-0.26	5.91	-1.91	9.54	2.13	9.28	-1.87	4.87	-3.75	7.26	-1.1	5.43	0.05	3.32
AGAU	-2.15	-2.09	-1.94	-2.22	0.75	-2.95	1.68	-0.08	-2.36	-2.13	0.33	-5.29	-0.82	-0.95	-2.98	-2.25
AGCA	-1.39	2.22	0.43	-0.84	-0.67	1.49	-0.8	1.44	-2.74	2.68	-3.54	5.35	-0.31	-1.14	-1.19	-1.15
AGCC	-2.16	4.89	-2.08	7.13	-1.97	3.9	0.25	4.43	-0.35	1.22	-0.57	0.8	-0.29	2.05	1.7	-0.47
AGCG	1.27	1.51	2.77	1.46	0.53	1.45	3.01	-0.2	2.24	0.11	4.36	0.8	2.6	-2.87	7.42	-2.61
AGCU	1	-4.3	2.32	-2.73	0.74	-2.74	3.18	-2.96	-0.7	-3.67	0.67	-5.47	1.54	-5.09	2.18	-4.13
AGGA	-0.82	2.5	0.59	2.61	0.68	0.73	3.16	1.16	-1.68	3.24	0.08	0.64	-1.15	2.6	-1.86	2.66
AGGC	-1.08	0.82	0	2.8	-0.41	-1.45	3.73	-0.27	-0.42	-0.01	-2.2	3.6	-1.86	4.81	-2.98	8
AGGG	3.36	-1.54	5.41	-1.04	1.03	-1.23	3.51	-1.65	3.33	-0.77	2.77	-0.12	3.69	-3.09	8.71	-5.45
AGGU	-2.88	-4.75	0.35	-4.16	-0.13	-5.22	2.92	-5.57	-1.55	-5.8	1.44	-6.11	-2.23	-5.5	-1.39	-3.68
AGUA	-2.53	0.72	-0.25	-2.73	-0.45	0.08	2.92	-2.81	-2.58	0.82	-0.38	-1.21	-1.83	1.26	-1.77	-0.78
AGUC	-1.54	-4.73	-1.77	-3.68	-0.32	-1.64	0.09	-0.49	-1.36	-0.72	-3.76	0.57	-0.96	-2.8	-0.19	-3.31
AGUG	-2.07	2.87	0.26	-0.19	-0.95	3.22	-0.28	2.9	0.16	1	0.75	1.38	-2.73	2.86	-0.94	3.87
AGUU	-2.43	-6.74	0.96	-6.22	1.52	-4.77	2.22	-4.16	-1.02	-7.36	0.91	-8.48	-2.25	-4.5	-2.31	-4.18
AUAA	-3.05	4.86	-2.58	4.84	-0.23	26.96	-4.11	31.01	0.91	0.87	-0.76	5.36	0.5	5.09	-3.4	6.22
AUAC	-2.5	4.21	-3.56	2.78	-1.53	4.19	0.15	1.45	-1.58	4.49	-1.92	1.85	-0.78	4.82	-7	7.71
AUAG	-1.51	-4.77	2.4	-6.26	1	-6.26	-0.78	-4.25	-1.68	-2.77	-0.12	-2.51	-3.61	-1.32	-3.24	-2.6
AUAU	0.02	14.02	-3.1	14.06	1.44	6.51	-1.15	5.74	-3.01	12.84	-3.77	10.34	1.78	12.45	-4.95	16.05
AUCA	-3.75	-4.22	-5.69	-3.77	-0.2	-7.06	1.11	-10.25	-2.16	-4.16	-4.32	-3.31	-2.19	-4.05	-3.88	-5.02
AUCC	-1.13	-6.48	-2.54	-5.42	-0.89	-7.08	0.4	-6.93	-1.58	-4.02	-2.05	-3.69	-1.67	-2.67	-1.19	-5.38
AUCG	-0.83	-0.44	-0.62	-2.02	-0.65	-2.31	2.95	-1.74	-1.29	-1.61	1.18	-2.84	0.62	-4.82	1.75	-4.97
AUCU	-2.73	-1.44	-2.08	-3.24	-1.11	-2.86	-1.8	-6.29	-1.38	-3.87	-2.81	-3.47	-0.34	-3.16	-3.32	-1.29
AUGA	-1.11	-1.58	-1.06	-3.88	0.11	-3.1	0.14	-2.44	-0.99	-0.58	-4.3	0.83	-2.37	0.04	-2.77	-0.47
AUGC	0.41	-4.49	-3.5	-4.51	1.12	-3.7	0.04	-2.8	-0.88	-3.67	-1.68	-2.44	-0.37	-4.25	-1.03	-4.69
AUGG	-1.19	-3.56	-3.45	-4.39	0.24	-3.78	1.64	-2.87	-1.22	-0.02	-3.32	0.04	0.08	-3.78	-1.57	-2.42
AUGU	1.56	9.12	-0.69	7.35	1.33	1.16	-0.05	0.72	-0.58	2.89	-0.62	0.71	-0.85	4.39	0.67	3.42
AUUA	-1.97	-2.89	-4.94	0.54	-1.65	3.36	-2.03	3.37	-1.93	-0.63	-0.15	-1.08	-2.38	-0.89	-1.15	-1.05
AUUC	-2.79	-3.01	-3.77	-3.47	-1	-3.3	-1.96	-2.19	-2.43	-1.25	-1.46	-1.22	-2.36	-0.7	-4.75	-1.17
AUUG	0.57	-9.04	-1.06	-7.92	0.06	-9.73	0.96	-10.63	0.4	-7.84	0.93	-9.92	-2.07	-9.57	-0.96	-11.28
AUUU	2.82	7.12	-0.47	11.67	2.26	2.08	1.71	-0.32	0.64	6.62	-0.95	9.72	0.39	7.29	0.2	6.51
CAAA	-3.47	-5.55	-2.54	-5.35	-0.44	-18.31	-3.48	-21.13	-1.99	-3.26	-3.13	-3.02	-1.78	-6.67	-4.82	-3.83
CAAC	0.52	-8.39	-2.69	-5.55	-0.13	-7.1	2.99	-8.09	-3.47	-3.66	-2.01	-3.22	-1.81	-7.03	-4.29	-6.5
CAAG	-1.72	-5.37	-1.46	-4.82	-0.5	-5.03	-1.21	-3.89	-1.07	-4.05	-1.68	-5.24	-2.81	-6.99	-5.23	-6.33
CAAU	-1.27	-14.99	-3.56	-12.89	0.91	-7.85	-3.2	-3.68	-0.51	-11.36	-2.75	-9.33	-1.77	-13.5	-3.48	-12.7
CACA	-1.49	5.84	-2.01	2.46	-0.81	6.41	-2.63	9.54	-3.26	4.45	-2.56	3.68	-2.86	8.46	-5.56	9.85
CACC	1.13	3.43	-1.62	4.96	0.71	2.26	0.38	4.57	-3.21	3.39	1.2	1.4	-0.09	2.49	-1.71	3.43
CACG	0.06	3.91	2.13	2.38	-1.1	5.43	0.47	6.69	-0.82	5.9	-0.82	7.31	-1.22	7.26	1.33	5.51
CACU	-2.13	4.63	-4.42	5.99	-0.24	1.67	0.54	3.45	-0.07	-0.64	1.34	-2.3	-1.86	2.97	-2.91	3.42
CAGA	-0.56	5.68	-2.02	8.51	-1.92	11.61	0.76	12.86	-1.17	5.12	-4	6.83	1.25	3.4	-2.27	4.8
CAGC	0.62	10.86	-1.43	11.39	-1.73	10.31	1.18	8.03	0.23	5.2	-2.2	8.51	1.38	6.55	-0.37	7.06
CAGG	-0.94	6.02	1.99	5.19	-0.62	4.41	4.86	2.97	-0.97	3.33	0.84	3.95	-0.39	6.01	1.23	6.18
CAGU	-2.33	5.89	0.6	1.69	0.91	8.13	2.06	5.66	-1.66	3.09	-2.38	4.42	-2.09	5.6	0.65	1.65
CAUA	-1.93	-0.77	-2.54	-4.13	-3.17	0.73	-3.16	-0.23	-2.64	0.35	-1.17	-1.97	-2.88	0.47	-4.57	1.84
CAUC	-1.24	0.11	-2.06	-0.1	-1.86	3.55	-0.65	0.56	-1.74	0.31	-0.39	-2.2	-1.33	0.68	-0.66	-2.4
CAUG	-0.72	-0.37	-5.48	-0.54	-0.9	2.34	-0.32	3	-0.96	-0.91	-3.46	0.3	-2.14	-0.41	-4.32	0.2
CAUU	-1.09	0.01	-4.18	-0.48	-1.07	4.11	-2.29	6.82	-2.34	1.78	0.59	-1.9	-1.92	1.46	-0.18	-4.4
CCAA	-0.45	-9.23	-0.11	-9.71	-0.71	-9.74	-0.65	-9.55	-0.51	-6.6	-0.54	-5.66	-1.93	-8.5	-2.4	-9.84
CCAC	0.63	7.15	-4.01	8.15	-0.41	4.97	0.86	5.38	-0.27	1.44	1.98	1.6	0.93	1.94	-2.87	5.13
CCAG	0.58	8.54	-0.19	10.64	-1.64	9.61	2.64	8.2	-0.04	5.35	-2.97	8.9	-0.15	7.19	0.19	7.09
CCAU	-0.62	-3.59	-4.21	-2.55	-1.58	0.26	-1.75	0.38	-2.31	-3.34	-0.4	-3.99	-1.15	-3.29	-1.4	-5.26
CCCA	1.21	1.98	1.15	-0.19	-3.43	1.79	1.07	1.32	-2.25	2.39	-2.37	5.69	-0.64	3.27	-0.78	3.69
CCCC	5.23	2.98	6.35	-0.59	0.46	2.93	4.22	2.27	2.09	2.69	5.63	0	6.03	0.46	5.34	2.41
CCCG	3.17	3.21	4.79	3.13	0.56	1.68	5.27	-0.14	1.63	2.52	4.22	2.25	2.41	2.53	7.05	4.66
CCCU	5.05	-3.19	3.89	-4.25	0.25	-2.05	-0.86	0.14	2.91	-2.51	4.62	-3.96	4.89	-2.83	4.65	-2.77
CCGA	-1.11	0.04	1.89	-0.9	0.1	-1.67	2.84	-1.89	0.85	-1.31	1.87	-2.59	-0.76	-1.15	1.56	-1.78
CCGC	3.71	2.88	4.37	3.82	-0.78	3.66	4.96	-0.08	0.4	4.53	3.64	1.19	3.77	2.57	6.82	1.37
CCGG	3.26	1.29	5.07	1.58	0.55	2.59	4.02	2.06	2.01	2.89	4.47	2.5	1.78	0.99	5.3	4.4
CCGU	1.04	0.85	2.55	-0.84	1.5	-1.49	1.08	1.18	-0.14	1.35	2.58	0.42	2.98	0.18	3.13	-0.01
CCUA	1.57	-8.98	0.06	-7.93	-1.77	-7.32	0.39	-7.57	-2.57	-4.64	-0.74	-4.92	-1.32	-6.19	-1.54	-6.91
CCUC	2.04	6.79	0.79	7.7	-0.08	5.17	-0.83	7.92	3.55	3.52	5.33	2.84	3.66	6.38	1.15	5.08
CCUG	1.66	5.79	-1.24	7.35	-2.6	5.67	1.58	2.1	0.71	6.17	1.12	6.72	1.84	8.66	1.97	9.02
CCUU	1.86	-6.06	0.9	-7.48	0.53	-4.54	0.07	-1.59	3.59	-6.28	1.32	-5.96	0.72	-6.22	2.75	-7.62
CGAA	-1.02	-3.96	2.26	-6.93	0.24	-4.82	4.48	-7.36	1.18	-4.33	3.26	-4.84	-0.85	-5.8	2.13	-5.16
CGAC	-0.08	0.08	2.9	-2.02	0.47	-0.1	0.54	1.84	-0.28	-2.38	1.57	-0.63	0.9	-2.77	3.13	-5.01
CGAG	-1.29	4.82	0.62	4.97	0.81	2.7	5.62	2.09	-0.51	2.07	3.68	-0.43	1.33	0.83	3.16	3.4
CGAU	0.94	-4.79	2.76	-4.68	-0.37	-1.36	4.77	-3.09	-0.83	-2.41	-1.58	-3.8	-1.55	-2.96	-0.07	-3.27
CGCA	1.59	-2.24	2.67	-2.47	0.23	-2.85	2.44	-1.98	0	-1.37	0	-1.28	0.34	-1.61	4.32	-3.91
CGCC	2.7	4.54	2.84	7.16	0.37	3.49	3.52	1.32	1.23	4.68	4.34	3.63	1.86	5.76	6.36	6.74
CGCG	2.75	5.14	4	8.05	0.88	4.33	3.85	3.38	1.29	4.48	3.05	8.14	1.94	9	5.86	6.88
CGCU	1.78	-0.62	2.85	-1.09	1.77	-1.85	5.59	-1.42	1.55	-1.09	4.45	-1.82	1.73	0.07	4.41	-0.64
CGGA	0.64	0.28	1.45	0.59	0	0.96	3.16	-0.47	0.76	-0.74	2.05	-0.33	2.32	-3.87	2.72	-1.69
CGGC	2.08	3.49	4.46	3.88	1.91	1.26	3.11	2.57	1.31	2.4	6.21	1.55	1.17	0.55	5.19	3.87
CGGG	1.23	5.96	4.72	5.43	-0.77	3.24	4.85	3.54	1.87	3.44	3.86	5.04	2.28	4.87	6.64	8.42
CGGU	2.59	-3.07	2.86	-3.19	-0.09	-0.09	2.97	-0.14	0.34	-1.51	2.74	-0.58	-1.27	-0.71	3.27	-2.78
CGUA	0.15	-2.45	2.52	-3.74	0.29	-2.83	0.28	-2.11	0.94	-0.97	0	-0.41	-1.33	-0.73	2.59	-2.11
CGUC	1.36	0.49	3.52	0.75	0.88	0.95	1.91	-0.34	1.41	-0.29	3.89	0.94	3.08	0.41	2.77	-1.12
CGUG	2.05	4.37	2.77	4.81	-0.44	5	0.28	6.16	0.47	6.02	2.07	5.69	1.47	6.56	3.19	5.11
CGUU	1	-2.9	1.84	-2.32	-0.3	-0.64	1.7	0.66	-0.31	-1.78	3.69	-3.44	1.84	-3.38	2.11	-3.25
CUAA	-0.48	-7.79	-0.28	-7.12	-2.31	-10.12	-0.94	-15.56	-0.8	-6.58	0	-6.13	-0.23	-6.86	-1.02	-7.73
CUAC	1.47	-2.41	-2	-1.16	-1.08	-0.01	-0.45	-0.16	0.24	-1.7	-1.67	-1.26	-0.67	-2.17	-0.72	-2.13
CUAG	0.21	-7.04	-0.54	-7.53	0.88	-6.27	0.48	-4.07	-0.46	-5.86	0.42	-6.72	-1.71	-6.81	-1.51	-6.94
CUAU	0.37	-5.29	-2.15	-4.85	-1.98	-4.39	-3.5	-2.06	-2.01	-2.62	-5.06	0.07	0.15	-5.29	-4.5	-3.4
CUCA	-3.7	2	-3.6	2	-2.88	4.08	-2.61	2.83	-3.18	3.48	-6.12	4.16	-1.1	4.36	-6.37	5.32
CUCC	1.12	9.03	-2.48	12.77	-0.94	5.17	0.85	5.15	4.35	0.3	4	3.81	2.84	6.61	2.53	7.43
CUCG	0.12	1.75	4.69	-1.51	0.37	1.33	1.59	2.8	1.65	-0.66	2.69	0.78	0.43	1.7	3.08	0.92
CUCU	2.34	3.33	-1.31	4.16	0.35	3.64	-6.48	10.38	1.49	3.89	0.89	5.18	2.91	3.16	-1.01	5.33
CUGA	-0.25	-1.35	-0.97	-1.45	0.39	1.54	2.59	0.34	-0.21	2.2	-0.55	1.4	0.69	1.56	-1.24	2.64
CUGC	3.17	6.49	0.12	7.64	0.71	4.56	1.82	3.94	3.68	3.72	3.2	3.45	1.87	7.38	2.7	5.4
CUGG	1.74	5.23	0.57	5.59	-1.56	7.16	0.37	5.08	2.8	5.01	1.33	4.44	2.75	7.97	1.99	7.66
CUGU	1.76	11.31	0.76	11.28	0.29	9.76	-0.53	8.54	2.11	8.31	1.66	8.11	3.14	8.16	1.15	8.5
CUUA	-0.51	-7.27	-1.02	-7.07	0.3	-7.16	-0.1	-8.04	-0.89	-4.97	0.42	-6.49	-0.94	-7.62	0.52	-8.16
CUUC	0.12	2.32	-1.51	1.34	-0.56	1.36	-0.47	2.05	0.31	1.71	2.53	-2.32	0.3	2.26	0.53	-0.78
CUUG	-1.25	-5.33	-0.77	-8.12	1.9	-4.03	2.64	-2.99	1.19	-7.14	1.06	-6.88	0.8	-7.94	2.84	-7.9
CUUU	0.15	-0.43	3.43	-3.6	1.3	3.5	-1.97	6.01	-0.71	2.05	-0.64	0.85	1.2	-2.48	1	-1.95
GAAA	-0.49	6.24	0.78	2.26	2.47	-8.32	0.84	-12.87	-2.81	7.7	-3.07	5.13	-1.47	7.5	-0.1	7.57
GAAC	-0.53	-2.69	-0.78	-2.58	0.3	-3.03	-1.13	0.66	-0.37	-1.35	0.94	-2.03	0.34	-4.56	0.92	-3.17
GAAG	0.81	1.72	2.97	1.03	0.42	0.67	3.09	-3.08	-0.26	-0.2	1.07	0.91	0.36	0.44	0.13	1.44
GAAU	-0.71	-1.47	-0.82	-1.85	-0.62	0.32	-0.17	-0.3	-1.94	-0.96	-3.51	-1.32	0.1	-1.69	-0.84	-3.92
GACA	-0.31	1	-2.17	2.75	-1.09	3.38	-0.2	5.83	-0.62	-0.02	-4.18	1.49	-1.7	1.01	-1.56	0.22
GACC	1.12	-2.52	1.69	-5.14	-0.63	-0.18	1.55	0.21	0.4	-3.14	-0.65	-1.29	-0.31	-2.91	0.4	-3.21
GACG	1.37	1.33	5.64	-0.02	1.97	0.2	3.39	2.54	1.31	-0.09	2.95	1.57	1.6	-0.51	3.86	-0.22
GACU	1.25	-2.05	-1.16	0.3	-0.89	2.24	1.6	0.67	0.41	0.56	-1.4	0.76	1.39	-3.95	1.54	-4.93
GAGA	-2.47	6.24	-0.36	8.16	-1.32	8.95	4.26	9.28	-2.06	5.22	-2.94	6.71	-1.52	8.06	0.02	7.89
GAGC	-2.51	5.81	-1.75	8.36	-0.72	3.97	1.16	7.06	-2.21	2.95	1.51	-1.09	1.8	0.4	6.26	-1.7
GAGG	-1.32	8.06	0.84	10.43	-1.84	7.62	5.42	6.24	1.14	4.79	0.88	7.25	0.25	10.04	2.03	11.85
GAGU	-4.29	-0.99	-0.72	-2.35	-2.68	2.3	1.25	6.07	0.21	0.22	1.62	0.27	-2.5	1.46	-3.15	3.33
GAUA	-2.19	-3.53	-1.57	-3.75	-0.23	-3.94	1.28	-2.5	-0.93	-1.57	-1.88	-2.78	-1.38	-2.06	-3.79	-2.59
GAUC	-2.96	-4.32	-3.28	-4.63	1.36	-5.27	2.77	-4.2	-0.52	-6.66	-1.49	-5.56	-1.39	-5.06	-2.6	-4.75
GAUG	1.51	-2.54	0.48	-3.08	1.97	-1.39	3.25	0.71	1.23	-0.87	0.38	-3.51	0.77	-0.32	0.56	-1.2
GAUU	-2.06	-6.55	-1.3	-5.53	-0.68	-2.27	2.15	-2.4	-0.06	-5.84	1.12	-6.02	0.3	-9.25	-0.08	-8.53
GCAA	-2.42	-7.92	-1.47	-6.52	1.49	-9.62	-0.64	-8.59	-2.58	-5.52	-2.33	-4.65	-2.58	-8.15	-3.13	-6.76
GCAC	-0.82	4.09	-1.93	3.54	1.06	1.16	2.24	3.69	-1.41	0.76	1.69	-1.64	-1.41	2.44	0.92	0.98
GCAG	0.48	7.28	2.23	5.58	-0.04	6.12	3.06	7.71	-0.28	2.36	-0.54	7.48	2.03	5.68	3.43	7.36
GCAU	-0.15	-2.7	-1.51	-4.19	-2.08	0.72	-0.16	1.12	-0.5	-0.81	-0.76	-2.42	-1.24	-2.76	-0.74	-5.17
GCCA	-0.03	2.92	-1.9	4.9	1	1.84	0.82	2.13	-0.66	0.68	-0.12	0.1	-0.67	0.13	-0.36	-1.56
GCCC	4.08	0.41	4.49	-0.95	-0.11	0.97	2.95	1.26	2.39	0.88	1.71	0.52	2.41	1.35	3.7	3.58
GCCG	1.9	4.9	5.59	1.82	-1.2	3.37	3.18	2.17	0.71	4.34	3.39	2.3	2.61	3.72	4.01	6.38
GCCU	0.52	2.57	-0.94	3.65	-1.92	2.74	1.24	0.68	1.51	2.76	2.41	3.08	1.59	2.07	3.58	0.34
GCGA	-0.91	0.8	1.22	0.19	-0.95	1.54	3.93	-0.7	0	-2.54	3.48	-0.56	2.38	-2.53	4.82	-1.85
GCGC	4.26	0.24	3.24	3.41	1.31	0.16	5.68	0.87	3	-0.33	2.73	3.01	1.43	4.95	8.81	3.51
GCGG	2.28	3.47	4.01	6.21	0.58	2.96	6.15	1.08	1.83	2.58	5.64	2.4	1.46	4.74	6.82	5.27
GCGU	2.94	-1.69	2.77	0.74	0.59	-0.31	3.26	-0.66	1.96	1.7	4.07	2.59	0.94	1.46	2.94	1.35
GCUA	0.98	-6.86	0.15	-7.07	-1.88	-4.33	-0.31	-4.38	-2.51	-3.69	0.49	-3.81	-1.35	-6.41	-1.49	-5.03
GCUC	1.4	-0.89	0.49	-1.47	0.1	0.59	1.99	0.6	-0.36	1.57	-1.6	3.5	-0.4	4.06	2.17	1.18
GCUG	1.77	6.06	1.73	5.47	1.48	4.95	3.53	4.69	4.62	1.86	3.1	2.58	3.41	7.87	3.13	7.6
GCUU	-1.27	-4.51	2.74	-6.36	2.42	-3.24	2.67	-3.6	-0.59	-3.06	1.1	-6.36	2.79	-8.86	3.41	-6.47
GGAA	1.16	3.69	2.65	0.79	-0.4	-0.71	0.4	-0.08	-2.67	4.68	0.18	2.4	0.39	1.61	2.08	0.72
GGAC	1.83	0.28	1.5	1.68	0.17	-0.02	2.88	1.1	0.81	-0.95	-1.64	1.42	2.06	-2.55	3.63	-4.93
GGAG	-1.55	10.33	1.4	11.01	-1.74	7.62	6.11	6.06	0.73	5.95	3.53	5.37	0.41	11.11	2.29	13.66
GGAU	-1.14	-4.63	-1.11	-5.41	0.38	-2.26	2.59	-2.63	2.21	-4.87	0.66	-4.47	1.03	-6.52	-1.24	-5.97
GGCA	-0.63	0.7	-1.08	0.56	-0.19	-1.86	1.97	0.25	-1.4	-0.62	1.24	-1.26	-0.51	0.58	1.23	-0.25
GGCC	2.64	2.87	5.11	-0.54	-0.58	2.86	3.44	-0.29	1.08	3.34	3.43	0.98	2.56	2.2	2.04	2.81
GGCG	1.33	4.95	2.15	9.12	-0.09	3.83	4.6	2.73	1.15	1.96	2.21	4.72	0.21	7.85	6.26	9.65
GGCU	1.42	-1.93	3.82	-4.28	-0.09	-0.43	3.07	-2.31	1.39	1.82	0.21	3.31	1.36	1.71	1.4	3.99
GGGA	-0.03	7.67	2.8	7.23	-0.73	2.39	2.59	3.86	3.61	3.12	4.65	3.12	3.1	4.24	7.04	3.79
GGGC	3.29	4.4	5.06	2.26	-0.28	2.16	4.83	1.38	4.6	0.66	3.21	1.34	4.43	2.61	8.91	-0.24
GGGG	5.96	3.76	9.71	3.92	1.1	2.9	4.56	2.91	6.54	4.16	6.48	1.39	8.32	2.88	13.38	0.54
GGGU	1.04	-3.43	3.09	-1.31	-0.34	-2.08	1.19	-1.71	0.81	-2.39	1.36	-2.71	2.67	-3.75	4.98	-4.02
GGUA	-3.24	-5.07	-0.47	-3.76	1.02	-7.24	0.87	-5.8	-1.16	-3.19	-2.13	-0.88	-1.93	-3.77	0.6	-3.97
GGUC	2.45	-6.43	0.84	-5.49	0.47	-3.23	1.06	-3.97	-0.51	-2.4	-0.7	-4.97	0.76	-4.03	-1.06	-2.99
GGUG	1.35	-0.63	2.18	-0.63	-0.85	2.05	3.09	1.6	1.74	1.98	3.1	1.12	0.68	3.79	4.34	1.65
GGUU	-0.49	-8.34	2.74	-6.29	-0.47	-4.57	0.33	-3.9	2.32	-9.77	1.43	-8.39	1.74	-11.84	0.03	-8.66
GUAA	-0.05	2.08	-0.6	4.31	0.26	-4.01	1.67	-6.18	-1.58	0.41	-2.72	1.46	-0.6	0.39	-1.05	1.74
GUAC	1.9	2.96	0.11	2.45	1.09	-0.01	-1.07	2.16	-0.52	0.83	1.13	-0.22	-0.3	1.13	0.31	-1.41
GUAG	-2.17	-1.93	0.56	-4.08	0	-1.48	3.21	-1.42	-0.82	-1.39	1.34	-3.42	-1.48	-1.76	1.99	-3.18
GUAU	1.92	8.1	1.38	6.62	3.37	0	2.12	-0.36	-0.36	5.21	0.41	3.5	-2.05	4.74	-1.18	3.77
GUCA	-0.57	-3.79	0.31	-4.5	-0.86	0.92	-0.55	-1.41	-1.5	-1.2	-2.07	-3.96	-0.8	-2.78	-2.86	-2.47
GUCC	2.63	-3.56	1.74	-4.66	-1.62	-0.48	0.75	-1.43	0.77	-2.32	-1.59	-0.73	3.74	-3.87	1.78	-3.2
GUCG	0.24	-2.27	1.35	-2.45	2.22	-2.59	4.04	-2.28	0.09	-1.35	3.09	-1.89	0.75	-3.18	3.05	-2.71
GUCU	-0.48	0.02	-2.18	1.94	-0.04	0.17	-1.37	1.18	1.24	3.66	-1.31	6.99	0.47	1.27	1.21	0.9
GUGA	-3.21	4.13	-4.31	8.91	-1.27	3.52	-0.13	5.59	0.9	-0.55	0.09	3.22	-1.43	2.3	0.3	1.25
GUGC	0.22	0.71	2.75	-1.9	0.57	2.26	0.97	4.36	1.14	1.06	2.68	-0.65	0.33	3.05	2.78	1.44
GUGG	1.62	2.65	3.87	-0.85	-1.39	5.1	2.85	1.67	0.85	6.83	2.51	5.28	1.06	7.48	1.73	8.14
GUGU	2.43	4.34	3.17	4.38	0.35	5.82	0.41	5	3.82	12.83	0.3	14.39	0.86	10.03	2.73	9.33
GUUA	-0.56	-4.57	-0.35	-3.74	-0.18	-6.42	-0.18	-6.09	-1.29	-4.95	0.61	-4.98	-1.88	-4.19	-0.85	-5.37
GUUC	-1.15	-3.17	-0.54	-2.83	0.78	-1.14	-0.86	1.37	-0.14	-6.12	1.73	-6.11	-1.38	-3.19	-3.15	-3.33
GUUG	1.09	-8.91	1	-6.36	0.47	-3.08	0.07	-1.63	2.18	-7.41	1.65	-8	2.33	-10.17	-0.21	-8
GUUU	1.89	0.89	6.86	0.44	3.2	1.81	3.44	3.08	3.25	-2.31	3.07	-1.65	2.23	-1.05	0.72	2.56
UAAA	-0.65	9.32	0.7	8.34	1.48	28.77	-2.55	23.89	2.68	1.7	1.32	1.82	1.87	8.18	2.06	5.97
UAAC	-0.99	-2.97	1.83	-5.72	0.19	-9.54	0.72	-12.08	1.83	-5.46	-0.29	-4.31	-1.04	-4.29	-0.03	-6.49
UAAG	-0.53	-7.42	-0.67	-6.81	-0.31	-9.86	-1.16	-9.83	-1.99	-3.9	-1.31	-5.27	-2.56	-6.01	0	-8.36
UAAU	0.41	-1.32	-2.59	2.92	0.75	-6.77	-0.5	-5.23	-2.64	-1.65	-1.09	2.22	-1.83	2.27	-2.64	3.49
UACA	-0.03	4.68	-3.56	5.77	-0.69	6	-2.6	7.12	0.13	3.57	-1.26	1.39	-2.23	5.5	-5.23	6.3
UACC	0.24	-3.04	-1.1	-3.32	-2.45	-1.65	-1.12	-1.6	-0.66	-2.83	-1.08	-2.5	-1.19	-2.68	-0.73	-3.14
UACG	0.42	-0.93	3.79	-0.77	-1.55	0.02	4.16	-2.7	0.83	-1.21	1.26	-1.78	0.8	-1.84	1.02	-1.29
UACU	0.23	0.89	-1.74	-0.4	-0.18	-1.36	-0.07	-1.92	-1.41	2	0.5	0.34	-0.54	0.92	-0.8	-1.66
UAGA	-1.48	-5.06	0	-5.42	1.79	-5.85	0.51	-3.79	-0.79	-4.8	-0.32	-4.84	-2.67	-1.96	-0.77	-2.46
UAGC	-0.45	-6.76	2.56	-8.04	0.1	-4.24	1.12	-3.35	-1.35	-3.3	-0.44	-3.24	-1.13	-5.8	1.31	-6.87
UAGG	-0.66	-9.43	0.7	-9.64	-0.33	-7.99	1.86	-5.47	1.05	-8.09	2.4	-9.15	-3.12	-8.32	0.45	-9.81
UAGU	-0.74	-7.25	1.29	-8.63	-0.68	-5.61	2.89	-6.77	-1.36	-6.14	-0.48	-8.31	-1.05	-6.21	-2.48	-4.42
UAUA	-0.34	14.57	-2.18	13.99	2.51	4.75	-2.01	4.31	-2.15	11.83	-1.92	12.03	3.01	11.14	-5.38	13.86
UAUC	-2	-2.19	-2.95	-2.34	-0.73	-4.45	-0.47	-6.27	-1.84	-1.3	-4.2	-1.28	-1.46	-3.38	-4.42	-1.47
UAUG	-0.52	1.5	-1.13	0.1	0.35	-3.64	-1.16	-1.3	-2.5	2.34	-4.85	2.94	-1.2	-1.5	-3.15	-0.75
UAUU	2.96	7.9	-0.98	12.25	2.1	5.54	1.1	6.99	0.62	9.89	-1.68	12.51	-1.96	9.8	-2.79	12.45
UCAA	-2.03	-13.27	-4.64	-10.42	-0.86	-12	-2.74	-12.7	-2.98	-9.16	-4.49	-9.58	-0.97	-12.48	-6.05	-9.99
UCAC	-2.24	1.55	-1.68	1.6	-0.77	1.6	-1.95	4.34	-2.12	1.67	-2.93	3.26	-4.46	7.33	-3.74	5.43
UCAG	-3.01	4.46	-1	1.62	-1.66	7.93	2.64	3.58	-1.59	3.16	-1.42	1.32	-0.07	3.17	-1.34	-0.39
UCAU	-3.4	1.03	-4.23	-1.66	-1.41	1.92	-1.73	0.8	-2.62	1.46	-2.01	-0.61	-1.82	0.78	-4.29	-1.22
UCCA	-0.8	-2.38	-4.69	0.74	-1.02	-1.64	-0.21	-1.37	0.61	-4.6	0.85	-3.22	0.63	-3.99	-1.39	-3.6
UCCC	3.2	1.58	2.15	2.94	-1.25	1.28	0.73	0.08	0.85	0.8	3.15	0.73	3.05	3.13	3.24	3.46
UCCG	0.51	-1.31	0.49	-0.25	-0.29	-0.71	3.48	-0.89	2.04	-1.33	3.38	-1.98	1.14	-0.36	2.9	-2.41
UCCU	1.76	-0.18	-0.94	0.87	-1.44	-0.11	0.2	0.66	1.25	1.07	0.16	0.97	-0.34	4.41	-1.39	2.38
UCGA	-0.21	-3.79	0.28	-6.19	0.73	-3.24	4.78	-3.7	-2.54	-2.15	1.09	-4.29	0.07	-4.59	1.93	-5.97
UCGC	-0.37	-1.37	-0.13	-0.65	1.34	-3.06	1.05	-1.38	0.83	-2.07	4.95	-2.99	-0.68	-1.19	0.81	0.62
UCGG	0.26	-0.49	1.85	-0.83	-0.3	-0.67	2.83	0.14	0.78	-2.05	2.76	-1.68	1.3	-3.58	4.49	-1.96
UCGU	0.72	-2.33	1.57	-2.48	0.32	-0.63	-0.7	0.68	1.21	-2.96	1.61	-2.37	1.59	-3.88	2.57	-3.9
UCUA	-0.86	-3.93	-2	-2.47	-0.8	-5.04	-3.62	-5.69	0.36	-4.02	-2.08	-2.84	-0.54	-4.58	-2.92	-3.22
UCUC	-1.67	8.69	-2.82	8.9	-2.95	9.81	-5.7	11.61	-0.17	5.95	-1.44	8.15	1.68	6.71	-2.24	11.79
UCUG	1.37	6.32	0.85	6.07	1.17	5.82	0.16	3.97	2.34	8.05	-0.12	9.04	2.85	5.59	-0.36	6.01
UCUU	-3.07	2.21	-2.16	-0.65	0.23	2.12	-3.08	5.51	-1.91	2.48	-0.65	1.18	0.22	0.24	-1.61	-0.73
UGAA	-0.02	-2.24	-1.23	-2.78	0.27	-3.88	0.76	-9.57	-0.37	-2.01	-1.4	-2.98	-0.29	-0.85	-1.62	-1.39
UGAC	0.8	-3.5	0.3	-4.29	0.29	-0.6	1.54	0.26	1.34	-2.18	-1.66	-1.15	-0.15	-3.31	-0.06	-4.1
UGAG	-5.71	1.06	-3.38	3	-2.55	2.3	0.72	8.06	-0.34	1	-0.73	0.94	-2.34	2.5	-0.42	2.94
UGAU	-1.42	-6.41	-2.55	-5.46	0.34	-5.45	2.02	-4.06	0.82	-6.91	-0.57	-6.15	-0.81	-7.23	0.08	-6.83
UGCA	-0.57	-3.1	-2.66	-1.4	1.3	-4.1	0.61	-1.5	0.22	-4.95	0.61	-5.21	-1.66	-2.06	-1.03	-0.92
UGCC	2.64	-0.87	0.13	-0.67	0.64	0.08	1.29	0.96	1.38	0.15	-0.2	0.69	1.05	-0.98	1.67	-0.46
UGCG	3.71	-5.35	3.7	-4.5	0.89	-2.79	7.04	-2.73	2.77	-1.77	5.81	-1.09	1.81	-0.48	4.8	-2.26
UGCU	-0.48	0.13	-1.76	-1.51	1.06	0.22	-0.5	1.28	0.4	-2.11	0.52	-1.95	0.9	-0.57	2.1	-2.3
UGGA	0.76	-0.48	-0.49	-2.35	-1.18	0.56	1.92	0.07	-0.61	-0.66	-1.23	1.14	0.59	-1.45	-0.55	-1.53
UGGC	1.01	-3.13	1.75	-6.19	-1.32	1.35	0.77	-2.42	-1.85	4.47	0.91	1.1	0.61	0.76	0.45	1.31
UGGG	-0.02	4.99	1.58	5.33	-1.83	2.1	0.75	3.53	3.9	1.86	3.36	1.26	3.75	3	5.61	0.65
UGGU	0.84	-8.53	0.79	-7.48	-0.07	-3.51	0.65	-4.2	3.05	-3.95	-0.86	-3.42	1.48	-5.61	-1.24	-3.98
UGUA	4.85	13.85	0.63	15.53	2.77	1.53	2.2	0.18	-0.56	6.54	0.63	3.93	-0.07	6.1	-0.07	6.43
UGUC	0.28	2.03	-1.07	0.59	-1.81	3.34	-1.37	1.36	1.26	3.26	-1.42	4.26	2.23	-0.23	1.14	0.37
UGUG	1.1	5.72	1.47	7.53	-0.11	7.4	0.11	7.35	3.71	12.96	0.23	14.88	2.02	10.26	1.72	10.87
UGUU	2.94	1.66	2.95	2.4	2.91	0.19	0.63	2.64	3.53	-3.25	2.73	-2.21	1.28	-0.38	-0.25	0.64
UUAA	1.14	0.13	1.83	-1.03	3.61	-1.52	-0.27	-3.97	0.14	-1.06	2.22	-2.79	-2.07	2.11	4.6	-3.84
UUAC	0.24	-1.44	0	-0.67	-1.7	-1.06	-1.4	0	-0.1	-1	1.45	-1.15	-2.44	0.36	0.23	-2.56
UUAG	-0.09	-12.77	1.42	-12.3	-0.24	-8.83	3.54	-9.42	-1.04	-9.96	0	-11.23	-0.96	-10.57	0.79	-9.79
UUAU	-0.64	5.99	-1.89	8.16	1.75	0.1	-0.58	1.54	-0.36	6.37	-2.96	9.74	-1.13	4.3	-4.01	7.42
UUCA	-2.67	-2.17	-3.29	-4.11	-0.55	-1.42	-2.7	0.64	-2.06	-2.3	0.69	-3.41	-2.31	-0.98	-3.02	-4.35
UUCC	2.02	-1.22	-0.18	1.21	-1.11	1.79	0.43	2.27	0.86	0.89	3.77	-2.18	-0.72	2.84	-0.97	1.54
UUCG	1.08	-6.11	-1.79	-4.5	0.68	-3.28	-0.17	-1.99	0.43	-4.86	3.15	-5.51	0.47	-6.28	1.84	-4.42
UUCU	-2.6	9.48	-1.02	7.94	-0.72	8.52	-2.35	8.89	-1.08	7.64	-0.64	5.27	1.69	5.23	-2.97	7.32
UUGA	-1.42	-10.5	-0.23	-11.2	-0.33	-6.37	2.44	-8.64	1.36	-9.73	-0.25	-11.82	-0.73	-10.14	0.6	-9.97
UUGC	-0.73	-8.14	-1.71	-6.85	2.08	-5.7	2.32	-2.94	-0.81	-7.17	0.06	-6.61	-0.48	-8.15	1.04	-6.02
UUGG	0	-9.96	2.9	-10.88	-1	-4.8	0.45	-5.05	1.97	-7.3	0.5	-7.06	2.41	-12.1	1.94	-13.18
UUGU	3.92	-0.73	2.03	2.9	2.51	-1.68	2.08	-0.45	2.67	-4.02	1.02	-1.91	2.3	-5.06	-1.44	-2.16
UUUA	2.93	6.41	5.72	4.44	6.08	0.16	2.65	-0.22	2.1	4.76	0.06	7.28	-1.09	7.48	1.91	5.48
UUUC	-0.94	7.45	0.13	6.95	-0.72	9.61	-1.66	10.5	-0.38	8.44	1.96	4.83	1.73	5.19	-0.53	7.22
UUUG	1.91	-5.1	3.68	-2.98	1.07	-0.7	2.54	-0.45	1.89	-4.2	-0.53	-2.15	2.54	-7.45	0.46	-4.3
UUUU	7.48	13.27	12.14	10.61	6.28	12.07	6.77	8.71	4.39	12.48	2.63	15.34	0.28	18.81	3.26	18.65
