# Supplementary figures and images for: A compendium of conserved cleavage and polyadenylation events in mammalian genes
Source: PubMed Central journal article supplement — Genome Res. 2018 Oct;28(10):1427–41. doi: 10.1101/gr.237826.118 (PMC6169888; doi:10.1101/gr.237826.118), 2018-10

**A**

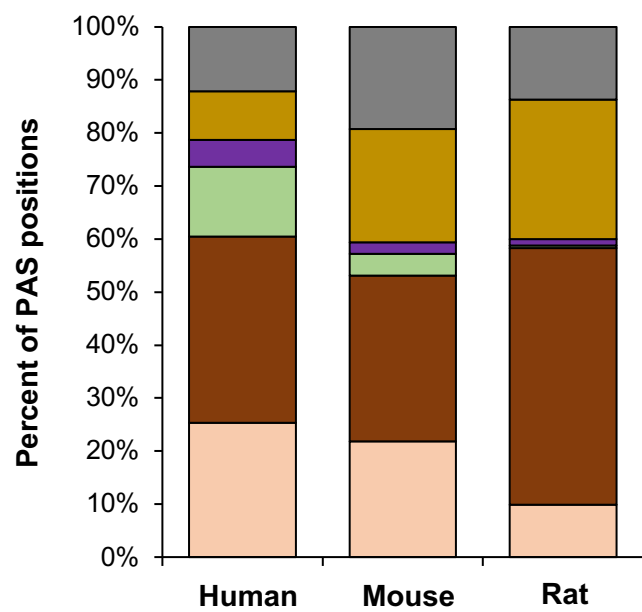

**B**

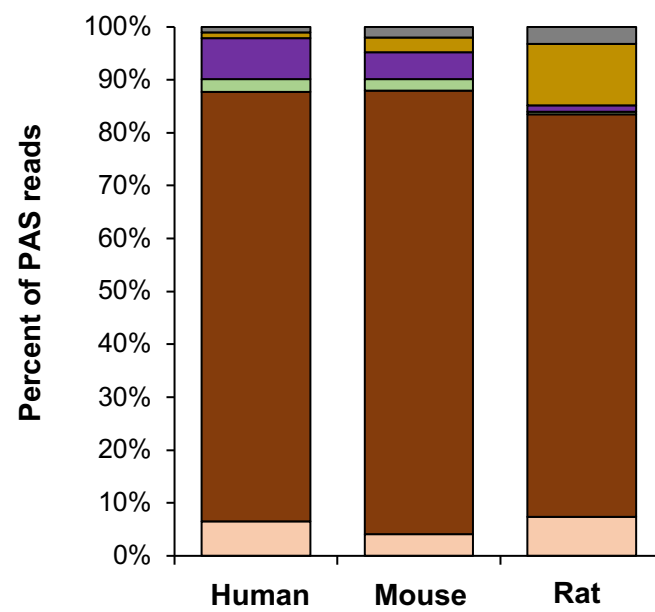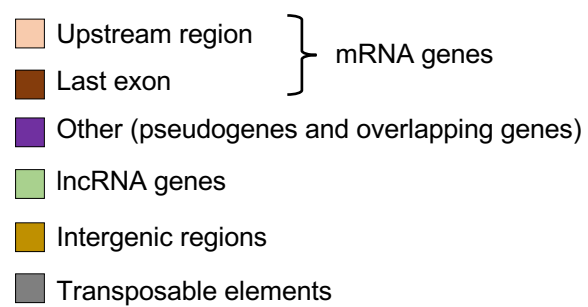

Figure S2. Statistics of PAS positions (A) and PAS reads (B) in human, mouse and rat genomes.

Supplement: supp_gr.237826.118_Supplemental_Fig_S2.pdf [file supp_gr.237826.118_Supplemental_Fig_S2.pdf]
